# Supplementary material
Source: PubMed Central journal article supplement (PMC10184681)
Supplement: NIHMS1893554-supplement-RoneyRudner2022-SI.pdf [file NIHMS1893554-supplement-RoneyRudner2022-SI.pdf]

## **Supplementary Information**

### **Two broadly conserved families of polyprenyl-phosphate transporters**

Ian J. Roney and David Z. Rudner\*

**Affiliations:** Department of Microbiology, Harvard Medical School, 77 Avenue Louis Pasteur, Boston, MA 02115

\*Correspondence to: [rudner@hms.harvard.edu](mailto:rudner@hms.harvard.edu)

#### **Table of contents:**

Supplementary figure legends (1)

Supplementary table captions (2)

Supplementary methods (3-14)

## Supplemental figure legends

**Supplemental Fig. 1 Uncropped gel source data for Extended data 2c.** (a) Uncropped western blot of the his tagged yngC protein with cropped region indicated. (b) Spliced image of visible and chemiluminescent channels to highlight molecular weight. (c) Uncropped western blot of the sigA protein with cropped region indicated. (d) Spliced image of visible and chemiluminescent channels to highlight molecular weight.

**Supplemental Fig. 2 Multiple sequence alignments of DedA (UptA) and PopT homologs that provide MX2401 resistance.** (a) Multiple sequence alignment of DedA (UptA) homologs that provide MX2401 resistance. Two highly conserved arginines are boxed in black and two membrane re-entrant helices that are commonly found in membrane embedded transporters<sup>13</sup> are boxed in red and blue. (b) Multiple sequence alignment of DUF368 (PopT) homologs that provide MX2401 resistance. Homologous re-entrant helices that are commonly found in membrane embedded transporters<sup>13</sup> are boxed in red and blue.

**Supplemental Fig. 3 DUF368 is broadly conserved in bacteria and archaea.** Dendrograms highlighting the distribution of DUF368 domains in a broad range of bacterial (a) and archaeal (b) species. All members of the pfam04018 (DUF368) were mapped onto representative phylogenetic trees.

## **Supplemental table captions**

**Supplemental table 1** Minimum inhibitory concentrations of *B. subtilis* (WT/ $\Delta$ 2) and *S. aureus* (WT/ $\Delta$ 2).

**Supplemental table 2a** Homologies between UptA from *B. subtilis* and *S. aureus* and the 8 *E. coli* DedA paralogs.

**Supplemental table 2b** Homologies between the DedA family members in *B. thailandensis*, *B. glumae*, and *K. pneumoniae* and the 8 *E. coli* DedA paralogs.

**Supplemental table 3** Uniprot IDs for the proteins included in gene neighborhood analyses

**Supplemental table 4** Strains used in this study

**Supplemental table 5** Plasmids used in this study

**Supplemental table 6** oligonucleotides used in this study

**Supplemental table 7** gBlocks used in this study

## Supplemental methods

### Strain constructions

#### ***B. subtilis* deletion mutants**

Most *B. subtilis* deletion mutants were made by isothermal assembly<sup>54</sup> followed by direct transformation. The assembly reactions contained three PCR products: two PCR products containing ~1500 base pairs upstream and downstream of the gene to be deleted, and a third PCR product containing an antibiotic resistance cassette. Antibiotic resistance cassettes with surrounding lox66/lox71 sites were amplified from pWX465(cat), pWX466(spec), pWX467(erm), pWX469(tet) and pWX470(kan) using the primers oJM028 and oJM029. The flanking regions for the respective deletions were amplified using PY79 genomic DNA as template and the following primer sets: *bceAB*(oIR626-629); *yngC* (oIR483-486); *ykoX*(oIR487-490); *ybfM*(oIR491-494); *yhjE*(oIR549-552); *yqeD* (oIR553-556); *ytxB*(oIR557-560); *uppS*(oIR447/oIR467,oIR468/oIR450); *ispH*(oIR733-736); *uppP*(oIR419-422); *mraY*(oIR344-347); *murG*(oIR388-391). The *bcrC* deletion was from the BKE collection and was backcrossed twice into PY79 and PCR confirmed.

#### **Construction of the $\Delta 6$ mutant BIR712 [ $\Delta yngC$ , $\Delta ykoX$ , $\Delta ybfM$ , $\Delta yhjE$ , $\Delta yqeD$ , $\Delta ytxB$ ]**

A  $\Delta 3$  strain, BIR656 [*sacA::Pveg-mTagBFP (phleo)*, *amyE::Pamj-yfp (cat)*, *yngC::erm*, *ykoX::kan*, *ybfM::tet*] was made by successive transformations of isothermal assembly products to delete *yngC*, *ykoX* and *ybfM* with lox66/71 flanked erm, kan and tet resistance cassettes respectively. The antibiotic resistance cassettes were then looped out from the  $\Delta 3$  strain using pDR244<sup>48</sup>. The remaining three deletions of *yhjE::kan*, *yqeD::erm* and *ytxB::tet* were made by successive rounds of isothermal assembly and transformation to create BIR712 (*sacA::Pveg-mTagBFP (phleo)*, *amyE::Pamj-YFP (cat)*, *yngC::lox72*, *ykoX::lox72*, *ybfM::lox72*, *yhjE::kan*, *yqeD::erm*, *ytxB::tet*).

#### **Construction of the $\Delta P_{yngC}$ ( $\Delta P_{sigM}$ ) mutant by allelic exchange**

pIR361 [Pmad3.1- $\Delta P_{yngC}$ ( $\Delta P_{sigM}$ )(erm)(amp)] was passaged through a recA+ *E. coli* strain (AB1157) and transformed into PY79. A transformant obtained at 37°C was grown overnight at 22°C and then serial dilutions plated on LB agar at 37°C. Single colonies were streaked onto LB and LB+MLS to identify strains that had looped out the integrated plasmid. The *yngC* promoter was PCR amplified from MLS(S) strains and sequenced confirm the promoter deletion.

#### **Construction of *yngC* point mutations**

Point mutations in *yngC-his10* were made by isothermal assembly and direct transformation into *B. subtilis*. Two DNA fragments were amplified using the genomic DNA of BIR1271 [*ycgO-Phyperspank-yngC-his10-spec-ycgO*] as a template using oligos flanking the upstream and downstream homology arms (oIR999 and oIR1000) and mutation specific primers (R112A = oIR987/oIR988, R118A = oIR989/oIR990, R112A,R118A = oIR991/oIR992). The two resulting amplification products were purified and added to the isothermal assembly reaction followed by direct transformation into BIR648. All mutants were confirmed by sequencing.

### **Construction of deletion mutants of *uptA(Sa)*, *popT(Sa)* and SAOUHSC\_0091 in *S. aureus***

BIR683 [ $\Delta$ 02816::spec], BIR688 [ $\Delta$ 00846::kan], BIR1476[ $\Delta$ SAOUHSC\_00901] were made by allelic replacement of coding regions with antibiotic resistance cassettes (or a short scar in the case of SAOUHSC\_0091) using a loop-in-loop-out approach as has been previously described<sup>55</sup> with minor modifications. Briefly, pMad based plasmids (pIR237[pMAD3.1-02816::spec(erm)(amp)], pIR238 [pMAD3.1-00846::kan(erm)(amp)] or pIR445[pMAD3.1-00901(erm)(amp)]) were electroporated into ATP001 (RN4220 WT) and selected on TSB agar + erm at 30C. Single colonies were inoculated in TSB + erm for 24 hours at 30C with two 1/100 back-dilutions. Serial dilutions were made of the cultures and aliquots were plated on TSA + erm at 42°C to lose unintegrated plasmids. Colonies were inspected for the expression of mScarlet which is constitutively expressed from the plasmid. Pink colonies, indicating plasmid integration, were selected and inoculated in TSB and grown without antibiotics at 30 °C for 24 hours with two 1/100 back-dilutions. Serial dilutions were made of the cultures and aliquots were plated on TSA at 30 °C. White colonies were streaked on TSA, TSA + erm and (TSA or TSA + spec or kan) to confirm the integration of the deletion cassette and loss of plasmid. The deletion mutants were confirmed by PCR with primers flanking the target gene.

### **Construction of complementation strains**

BIR691 [attB::Ptet-02816 (cat)] and BIR695 [attB::Ptet-00846 (cat)] were made by electroporating pIR239 [attB::Ptet-02816 (cat)(amp)] or pIR240 [attB::Ptet-00846 (cat)(amp)] into a L54a integrase expressing strain RN4220 (pTP044) and selecting on TSA + Cm at 42 °C to lose the integrase expressing plasmid. PIR239 and pIR240 were integrated into the attB (L54a) site within the *geh* gene. The correct integration was confirmed by PCR.

BIR715 [ $\Delta$ 02816::spec,  $\Delta$ 00846::kan] was constructed by phage transduction of the 846::kan deletion into BIR683[2816::spec] using phage 80alpha. PCR was performed to confirm the transduction with PCR primers flanking the deleted genes.

BIR1279 [[ $\Delta$ 02816::spec,  $\Delta$ 00846::kan, attB::Ptet-02816 (cat)], BIR1280 [[ $\Delta$ 02816::spec,  $\Delta$ 00846::kan, attB::Ptet-00846 (cat)] were constructed by successive rounds of phage transduction of the 2816::spec and 846::kan markers respectively. The gene deletions were confirmed by PCR.

BIR1478 [ $\Delta$ 00901::scar,  $\Delta$ 02816::spec,  $\Delta$ 00846::kan, attB::Ptet-02816 (cat)], BIR1481 [ $\Delta$ 00901::scar,  $\Delta$ 02816::spec,  $\Delta$ 00846::kan, attB::Ptet-00846 (cat)] were constructed by allelic exchange of pIR445 which had been electroporated into BIR1279 or BIR1281. The strains were grown in aTc the entire time and the deletion was confirmed by PCR.

### **Plasmid Constructions**

#### **pIR233 [ycgO::Phyperspank-bcrC (spec) (amp)]**

pIR233 was generated in a two-piece ligation with PCR product containing the bcrC gene (amplified from PY79 gDNA with oIR374 and oIR375) and pCB090 [ycgO::Phyperspank(spec)] digested with HindIII and SpeI.

#### **pIR234 [ycgO::Phyperspank-uppP (spec) (amp)]**

pIR234 was generated in a two-piece ligation with PCR product containing the uppP gene (amplified from PY79 gDNA with oIR376 and oIR377) and pCB090 [ycgO::Phyperspank(spec)] digested with HindIII and SpeI.

#### **pIR224 [ycgO::Phyperspank-yngC (spec) (amp)]**

pIR224 was generated in a two-piece ligation with PCR product containing the yngC gene (amplified from PY79 gDNA with oIR496 and oIR497) and pCB090 [ycgO::Phyperspank(spec)] digested with HindIII and SpeI.

#### **pIR226 [ycgO:: Phyperspank-ykoX (spec) (amp)]**

pIR226 was generated in a two-piece isothermal assembly reaction with PCR product containing the ykoX gene (amplified from PY79 gDNA with oIR499 and oIR500) and pCB090 [ycgO::Phyperspank(spec)] digested with HindIII and SpeI.

**pIR239 [attB::Ptet-02816 (cat) (amp)]**

pIR239 was generated in a two-piece ligation with PCR product containing the SAOUHSC\_02816 gene (amplified from RN4220 gDNA with oIR534 and oIR535) and pTB005[attB::Ptet-02816] digested with KpnI and EcoRI.

**pIR240 [attB::Ptet-00846 (cat) (amp)]**

pIR240 was generated in a two-piece isothermal assembly reaction with PCR product containing the SAOUHSC\_00846 gene (amplified from RN4220 gDNA with oIR536 and oIR537) and pTB005[attB::Ptet-02816] digested with KpnI and EcoRI.

**pIR237 [Pmad3.1-2816::spec (amp)]**

pIR237 was generated in a four-piece isothermal assembly reaction with PCR products flanking the SAOUHSC\_02816 gene (amplified from RN4220 gDNA with oIR522/oIR523 and oIR526/oIR527), a PCR product encoding the spectinomycin resistance cassette (amplified from pWX466 with oIR524/oIR525) and pMR091[Pmad3.1 (amp)] digested with BamHI and EcoRI.

**pIR238 [Pmad3.1-846::kan (amp)]**

pIR237 was generated in a four-piece isothermal assembly reaction with PCR products flanking the SAOUHSC\_00846 gene (amplified from RN4220 gDNA with oIR528/oIR529 and oIR532/oIR533), a PCR product encoding the kanamycin resistance cassette (amplified from pWX470 with oIR530/oIR531) and pMR091[Pmad3.1 (amp)] digested with BamHI and EcoRI.

**pIR400 [ycgO::Phyperspank-popT(Sp) (spec) (amp)]**

pIR226 was generated in a two-piece isothermal assembly reaction with PCR product containing the SPD\_0872 gene (amplified from S.pneumoniae D39 gDNA with oIR1132 and oIR1133) and pCB090 [ycgO::Phyperspank(spec)] digested with HindIII and SpeI.

**pIR388 [ycgO::Phyperspank-popT(Vc) (spec) (amp)]**

pIR226 was generated in a two-piece isothermal assembly reaction with PCR product containing the MS6\_A0029 gene of *V. cholerae* C6706 (amplified from gBlock *Vc.popT* with oIR1128 and oIR1129) and pCB090 [*ycgO*::Phyperspank(spec)] digested with HindIII and SpeI.

**pIR399 [*ycgO*::Phyperspank-popT(Bc) (spec) (amp)]**

pIR226 was generated in a two-piece isothermal assembly reaction with PCR product containing the BC5158 gene of *B. cereus* atcc14579 (amplified from gDNA with oIR1130 and oIR1131) and pCB090 [*ycgO*::Phyperspank(spec)] digested with HindIII and SpeI.

**pIR397 [*ycgO*::Phyperspank-uptA(Pa) (spec) (amp)]**

pIR397 was generated in a two-piece isothermal assembly reaction with PCR product containing the PA4029 gene of *P.aeruginosa* PAO1 (amplified from gBlock *Pa.uptA* with oIR1128 and oIR1129) and pCB090 [*ycgO*::Phyperspank(spec)] digested with HindIII and SpeI.

**pIR393 [*ycgO*::Phyperspank-popT(Bb) (spec) (amp)]**

pIR393 was generated in a two-piece isothermal assembly reaction with PCR product containing the BBUBOL26\_RS01045 gene of *B. burgdorferi* (amplified from gBlock *Bb.popT* with oIR1128 and oIR1129) and pCB090 [*ycgO*::Phyperspank(spec)] digested with HindIII and SpeI.

**pIR405 [*ycgO*::Phyperspank-uptA(Bc) (spec) (amp)]**

pIR405 was generated in a two-piece isothermal assembly reaction with PCR product containing the BC5040 gene of *B. cereus* atcc14579 (amplified from gDNA with oIR1148 and oIR1149) and pCB090 [*ycgO*::Phyperspank(spec)] digested with HindIII and SpeI.

**pIR411 [*ycgO*::Phyperspank-popT(Ef) (spec) (amp)]**

pIR411 was generated in a two-piece isothermal assembly reaction with PCR product containing the gene of *E. faecium* 13.SD.W.09 (amplified from gBlock *Ef.popT* with oIR1128 and oIR1129) and pCB090 [*ycgO*::Phyperspank(spec)] digested with HindIII and SpeI.

**pIR401 [*ycgO*::Phyperspank-popT(Cg) (spec) (amp)]**



pIR401 was generated in a two-piece isothermal assembly reaction with PCR product containing the CGP\_RS06655 gene of *C. glutamicum* MB001 (amplified from gDNA with oIR1134 and oIR1135) and pCB090 [ycgO::Phyperspank(spec)] digested with HindIII and SpeI.

**pIR211 [ycgO::Pspank-uppS (spec) (amp)]**

pIR211 was generated in a two-piece isothermal assembly reaction with PCR product containing the uppS gene (amplified from PY79 gDNA with oIR439 and oIR440) and pCB084 [ycgO::Pspank(spec)] digested with HindIII and SpeI.

**pIR278 [ycgO::Pspank-ispH (spec) (amp)]**

pIR278 was generated in a two-piece isothermal assembly reaction with PCR product containing the ispH gene (amplified from PY79 gDNA with oIR737 and oIR738) and pCB084 [ycgO::Pspank(spec)] digested with HindIII and SpeI.

**pIR235 [ycgO::Phyperspank-yghB (spec) (amp)]**

pIR235 was generated in a two-piece ligation with PCR product containing the yghB gene (amplified from MG1655 gDNA with oIR518 and oIR519) and pCB090 [ycgO::Phyperspank(spec)] digested with HindIII and SpeI. The resulting plasmid was sequence confirmed.

**pIR236 [ycgO::Phyperspank-yqjA (spec) (amp)]**

pIR236 was generated in a two-piece ligation with PCR product containing the yqjA gene (amplified from MG1655 gDNA with oIR520 and oIR521) and pCB090 [ycgO::Phyperspank(spec)] digested with HindIII and SpeI.

**pIR403[ycgO::Phyperspank-dedA (spec) (amp)]**

pIR403 was generated in a two-piece isothermal assembly reaction with PCR product containing the dedA gene (amplified from MG1655 gDNA with oIR1144 and oIR1145) and pCB090 [ycgO::Phyperspank(spec)] digested with HindIII and SpeI.

**pIR406 [ycgO::Phyperspank-yabI (spec) (amp)]**

pIR406 was generated in a two-piece isothermal assembly reaction with PCR product containing the yabI gene (amplified from MG1655 gDNA with oIR1180 and oIR1181) and pCB090 [ycgO::Phyperspank(spec)] digested with HindIII and SpeI.

**pIR407 [ycgO::Phyperspank-yohD (spec) (amp)]**

pIR407 was generated in a two-piece isothermal assembly reaction with PCR product containing the yohD gene (amplified from MG1655 gDNA with oIR1182 and oIR1183) and pCB090 [ycgO::Phyperspank(spec)] digested with HindIII and SpeI.

**pIR408 [ycgO::Phyperspank-ydjX (spec) (amp)]**

pIR408 was generated in a two-piece isothermal assembly reaction with PCR product containing the ydjX gene (amplified from MG1655 gDNA with oIR1184 and oIR1185) and pCB090 [ycgO::Phyperspank(spec)] digested with HindIII and SpeI.

**pIR409 [ycgO::Phyperspank-ydjZ (spec) (amp)]**

pIR409 was generated in a two-piece isothermal assembly reaction with PCR product containing the ydjZ gene (amplified from MG1655 gDNA with oIR1186 and oIR1187) and pCB090 [ycgO::Phyperspank(spec)] digested with HindIII and SpeI.

**pIR410 [ycgO::Phyperspank-yqaA (spec) (amp)]**

pIR410 was generated in a two-piece isothermal assembly reaction with PCR product containing the yqaA gene (amplified from MG1655 gDNA with oIR1188 and oIR1189) and pCB090 [ycgO::Phyperspank(spec)] digested with HindIII and SpeI.

**pIR385 [amyE::PyngC-yfp (cat) (amp)]**

pIR385 was generated in a three-piece isothermal assembly reaction with PCR product containing the yfp gene with the yngC promoter in the primer overhang (amplified from pAM155 with oIR1105 and oIR1106) and pDG364 [amyE::cat] (PCR linearized with oIR1107 and oIR1108).

**pIR361 [Pmad3.1-PyngC( $\Delta$ PsigM) (erm) (amp)]**

pIR361 was generated in a three-piece isothermal assembly reaction with PCR products flanking the sigM promoter of yngC (oIR1031/oIR1032 and oIR1033/oIR1034) and pMR091 digested with BamHI and EcoRI.

**pIR392 [ycgO::Phyperspank-uptA(Ab) (spec) (amp)]**

pIR392 was generated in a two-piece isothermal assembly reaction with PCR product containing the AB17975 gene of *A. baumannii* (amplified from gBlock Ab.uptA with oIR1128 and oIR1129) and pCB090 [ycgO::Phyperspank(spec)] digested with HindIII and SpeI.

**pIR352 [ycgO::Phyperspank-yngC-his10 (spec) (amp)]**

pIR352 was generated in a two-piece ligation with PCR product containing the yngC gene (amplified from PY79 gDNA with oIR496 and oIR986) and pIR301 [ycgO::Phyperspank-MCS-his10(spec)] digested with HindIII and SpeI.

**pIR451 [ycgO::Phyperspank-dedA(BS18575)(spec)(amp)]**

pIR451 was generated in a two-piece isothermal assembly reaction with PCR product containing the B18575 gene of *B. simplex* (amplified from gBlock BS18575 with oIR1128 and oIR1129) and pCB090 [ycgO::Phyperspank(spec)] digested with HindIII and SpeI.

**pIR455 [ycgO::Phyperspank-dedA(BS19690)(spec)(amp)]**

pIR455 was generated in a two-piece isothermal assembly reaction with PCR product containing the B19690 gene of *B. simplex* (amplified from gBlock BS19690 with oIR1128 and oIR1129) and pCB090 [ycgO::Phyperspank(spec)] digested with HindIII and SpeI.

**pIR456 [ycgO::Phyperspank-dedA(BS19110)(spec)(amp)]**

pIR456 was generated in a two-piece isothermal assembly reaction with PCR product containing the B19110 gene of *B. simplex* (amplified from gBlock BS19110 with oIR1128 and oIR1129) and pCB090 [ycgO::Phyperspank(spec)] digested with HindIII and SpeI.

**pIR457 [ycgO::Phyperspank-dedA(BS15480)(spec)(amp)]**

pIR457 was generated in a two-piece isothermal assembly reaction with PCR product containing the B15480 gene of *B. simplex* (amplified from gBlock BS15480 with oIR1128 and oIR1129) and pCB090 [ycgO::Phyperspank(spec)] digested with HindIII and SpeI.

**pIR458 [ycgO::Phyperspank-dedA(BS9915)(spec)(amp)]**

pIR458 was generated in a two-piece isothermal assembly reaction with PCR product containing the BS9915 gene of *B. simplex* (amplified from gBlock BS9915 with oIR1128 and oIR1129) and pCB090 [ycgO::Phyperspank(spec)] digested with HindIII and SpeI.

**pIR459 [ycgO::Phyperspank-dedA(BS7270)(spec)(amp)]**

pIR459 was generated in a two-piece isothermal assembly reaction with PCR product containing the BS7270 gene of *B. simplex* (amplified from gBlock BS7270 with oIR1128 and oIR1129) and pCB090 [ycgO::Phyperspank(spec)] digested with HindIII and SpeI.

**pIR460 [ycgO::Phyperspank-dedA(BS6870)(spec)(amp)]**

pIR460 was generated in a two-piece isothermal assembly reaction with PCR product containing the BS6870 gene of *B. simplex* (amplified from gBlock BS6870 with oIR1128 and oIR1129) and pCB090 [ycgO::Phyperspank(spec)] digested with HindIII and SpeI.

**pIR461 [ycgO::Phyperspank-dedA(BS6295)(spec)(amp)]**

pIR461 was generated in a two-piece isothermal assembly reaction with PCR product containing the BS6295 gene of *B. simplex* (amplified from gBlock BS6295 with oIR1128 and oIR1129) and pCB090 [ycgO::Phyperspank(spec)] digested with HindIII and SpeI.

**pIR449 [ycgO::Phyperspank-dedA(PC16690)(spec)(amp)]**

pIR449 was generated in a two-piece isothermal assembly reaction with PCR product containing the PC16690 gene of *P. cellulosityticus* (amplified from gBlock PC16690 with oIR1128 and oIR1129) and pCB090 [ycgO::Phyperspank(spec)] digested with HindIII and SpeI.

**pIR462 [ycgO::Phyperspank-dedA(PC28990)(spec)(amp)]**

pIR462 was generated in a two-piece isothermal assembly reaction with PCR product containing the PC28990 gene of *P. cellulolyticus* (amplified from gBlock PC28990 with oIR1128 and oIR1129) and pCB090 [ycgO::Phyperspank(spec)] digested with HindIII and SpeI.

**pIR463 [ycgO::Phyperspank-dedA(PC28030)(spec)(amp)]**

pIR463 was generated in a two-piece isothermal assembly reaction with PCR product containing the PC28030 gene of *P. cellulolyticus* (amplified from gBlock PC28030 with oIR1128 and oIR1129) and pCB090 [ycgO::Phyperspank(spec)] digested with HindIII and SpeI.

**pIR464 [ycgO::Phyperspank-dedA(PC16380)(spec)(amp)]**

pIR464 was generated in a two-piece isothermal assembly reaction with PCR product containing the PC16380 gene of *P. cellulolyticus* (amplified from gBlock PC16380 with oIR1128 and oIR1129) and pCB090 [ycgO::Phyperspank(spec)] digested with HindIII and SpeI.

**pIR465 [ycgO::Phyperspank-dedA(PC15755)(spec)(amp)]**

pIR465 was generated in a two-piece isothermal assembly reaction with PCR product containing the PC15755 gene of *P. cellulolyticus* (amplified from gBlock PC15755 with oIR1128 and oIR1129) and pCB090 [ycgO::Phyperspank(spec)] digested with HindIII and SpeI.

**pIR466 [ycgO::Phyperspank-dedA(PC7440)(spec)(amp)]**

pIR466 was generated in a two-piece isothermal assembly reaction with PCR product containing the PC7440 gene of *P. cellulolyticus* (amplified from gBlock PC7440 with oIR1128 and oIR1129) and pCB090 [ycgO::Phyperspank(spec)] digested with HindIII and SpeI.

**pIR467 [ycgO::Phyperspank-dedA(PC5445)(spec)(amp)]**

pIR467 was generated in a two-piece isothermal assembly reaction with PCR product containing the PC5445 gene of *P. cellulolyticus* (amplified from gBlock PC5445 with oIR1128 and oIR1129) and pCB090 [ycgO::Phyperspank(spec)] digested with HindIII and SpeI.

**pIR468 [ycgO::Phyperspank-dedA(PC4905)(spec)(amp)]**

pIR468 was generated in a two-piece isothermal assembly reaction with PCR product containing the PC4905 gene of *P. cellulolyticus* (amplified from gBlock PC4905 with oIR1128 and oIR1129) and pCB090 [ycgO::Phyperspank(spec)] digested with HindIII and SpeI.

**pIR448 [ycgO::Phyperspank-SAOUHSC\_00901(spec)(amp)]**

pIR468 was generated in a two-piece isothermal assembly reaction with PCR product containing the SAOUHSC\_00901 gene of *S. aureus* (amplified from RN4220 genomic DNA with oIR1367 and oIR1368) and pCB090 [ycgO::Phyperspank(spec)] digested with HindIII and SpeI.

**pIR232 [ycgO::Phyperspank-SAOUHSC\_00846(spec)(amp)]**

pIR232 was generated in a two-piece isothermal assembly reaction with PCR product containing the SAOUHSC\_00846 gene of *S. aureus* (amplified from RN4220 genomic DNA with oIR506 and oIR507) and pCB090 [ycgO::Phyperspank(spec)] digested with HindIII and SpeI.

**pIR230 [ycgO::Phyperspank-SAOUHSC\_02816(spec)(amp)]**

pIR230 was generated in a two-piece ligation reaction with PCR product containing the SAOUHSC\_02816 gene of *S. aureus* (amplified from RN4220 genomic DNA with oIR504 and oIR505) and pCB090 [ycgO::Phyperspank(spec)] digested with HindIII and SpeI.

**pIR445 [pMad3.1-SAOUHSC\_00901::scar]**

pIR445 was generated in a three-piece isothermal assembly reaction with PCR products flanking the SAOUHSC\_00901 gene (amplified from RN4220 gDNA with oIR1348/oIR1349 and oIR1350/oIR1351) and pMR091[Pmad3.1 (amp)] digested with BamHI and EcoRI.

**pIR441 [P<sub>low</sub>-uppS(ermR)(amp)]**

pIR441 was generated in a two-piece ligation reaction with PCR product containing uppS (SAOUHSC\_01237) gene of *S. aureus* (amplified from RN4220 gDNA with oIR1326 and oIR1327) and pLow digested with BamHI and EcoRI.

**pIR442 [P<sub>low</sub>-murAA(ermR)(amp)]**

pIR442 was generated in a two-piece ligation reaction with PCR product containing murAA (SAOUHSC\_02337) gene of *S. aureus* (amplified from RN4220 gDNA with oIR1332 and oIR1333 and pLow digested with BamHI and EcoRI.

All plasmids were sequence confirmed. All gene fusions to the Phyperspank promoter contained a synthetic optimized ribosome binding. All gene fusions to the Pspank promoter contained the native ribosome binding site.

**Supplementary Table 1 Minimum inhibitory concentrations of *B. subtilis* (WT/ $\Delta$ 2) and *S. aureus* (WT/ $\Delta$ 2).**

| <b>Antibiotic</b> | <b><i>S. aureus</i> fold change (WT/<math>\Delta</math>2)</b> | <b><i>B. subtilis</i> fold change (WT/<math>\Delta</math>2)</b> |
|-------------------|---------------------------------------------------------------|-----------------------------------------------------------------|
| MX2401            | 256                                                           | 8                                                               |
| Tunicamycin       | 128-512                                                       | 1                                                               |
| Daptomycin        | 1                                                             | 1                                                               |
| Vancomycin        | 1-2                                                           | 1                                                               |
| Teicoplanin       | 4                                                             | 1                                                               |
| Bacitracin        | 8                                                             | 1-2                                                             |
| Fosfomycin        | 1                                                             | 1                                                               |
| Penicillin G      | 2                                                             | 1                                                               |
| Ampicillin        | 2                                                             | 2                                                               |
| D-cycloserine     | 2                                                             | 1                                                               |
| Tetracycline      | 2                                                             | 1                                                               |
| Chloramphenicol   | 2                                                             | 1                                                               |
| Nalidixic acid    | 1                                                             | 1                                                               |



**Supplementary Table 2a Homologies between UptA from *B. subtilis* and *S. aureus* and the 8 *E. coli* DedA paralogs.**

| <b>DedA member that provides MX2401 resistance</b>                               | <i>E.coli</i> DedA paralogs | E-Value |
|----------------------------------------------------------------------------------|-----------------------------|---------|
| YngC (UptA <sup>Bs</sup> )<br>( <i>Bacillus subtilis</i> PY79)                   | DedA (UptA <sup>Ec</sup> )  | 9e-13   |
|                                                                                  | Yabl                        | 8e-12   |
|                                                                                  | YohD                        | 3e-11   |
|                                                                                  | YqjA                        | 9e-08   |
|                                                                                  | YghB                        | 2e-06   |
|                                                                                  | YdjZ                        | -----   |
|                                                                                  | YdjX                        | -----   |
|                                                                                  | YqaA                        | -----   |
| SAOUHSC_002816 (UptA <sup>Sa</sup> )<br>( <i>Staphylococcus aureus</i> NCTC8325) | DedA (UptA <sup>Ec</sup> )  | 1e-13   |
|                                                                                  | YqjA                        | 3e-12   |
|                                                                                  | YghB                        | 1e-08   |
|                                                                                  | YdjZ                        | 6e-06   |
|                                                                                  | Yabl                        | 3e-06   |
|                                                                                  | YohD                        | 1e-06   |
|                                                                                  | YqaA                        | 0.002   |
|                                                                                  | YdjX                        | -----   |

**Supplementary Table 2b Homologies between the DedA family members in *B. thailandensis*, *B. glumae*, and *K. pneumoniae* and the 8 *E. coli* DedA paralogs.**

| <b>DedA member that provides colistin resistance</b> | <i>E. coli</i> DedA paralogs | E-Value |
|------------------------------------------------------|------------------------------|---------|
| DbcA ( <i>Burkholderia thailandensis</i> E264)       | DedA (UptA <sup>Ec</sup> )   | 2e-71   |
|                                                      | YqjA                         | 5e-34   |
|                                                      | YghB                         | 4e-28   |
|                                                      | Yabl                         | 2e-12   |
|                                                      | YohD                         | 1e-10   |
|                                                      | YdjZ                         | 1e-06   |
|                                                      | YdjX                         | -----   |
|                                                      | YqaA                         | -----   |
| DbcA ( <i>Burkholderia glumae</i> )                  | DedA (UptA <sup>Ec</sup> )   | 6e-72   |
|                                                      | YqjA                         | 2e-37   |
|                                                      | YghB                         | 5e-30   |
|                                                      | YohD                         | 5e-12   |
|                                                      | Yabl                         | 2e-12   |
|                                                      | YdjZ                         | 7e-07   |
|                                                      | YdjX                         | 4e-05   |
|                                                      | YqaA                         | -----   |
| DkcA ( <i>Klebsiella pneumoniae</i> ST258)           | DedA (UptA <sup>Ec</sup> )   | 4e-145  |
|                                                      | YqjA                         | 2e-28   |
|                                                      | YghB                         | 2e-24   |
|                                                      | Yabl                         | 2e-15   |
|                                                      | YohD                         | 3e-14   |
|                                                      | YdjZ                         | 4e-09   |
|                                                      | YdjX                         | -----   |
|                                                      | YqaA                         | -----   |
| NMB1052 ( <i>Neisseria meningitidis</i> NMB)         | DedA (UptA <sup>Ec</sup> )   | 6e-107  |
|                                                      | YqjA                         | 1e-29   |
|                                                      | YghB                         | 3e-27   |
|                                                      | Yabl                         | 4e-15   |
|                                                      | YohD                         | 1e-12   |
|                                                      | YdjZ                         | 4e-07   |
|                                                      | YqaA                         | 2e-04   |
|                                                      | YdjX                         | -----   |

**Supplementary Table 3 Uniprot IDs for the proteins included in gene neighborhood analyses**

| Neighborhood analysis        | Organism                   | Uniprot ID |
|------------------------------|----------------------------|------------|
| <b>Figure 3A</b>             | <i>B. smithii</i>          | A0A0H4PDF0 |
|                              | <i>B. simplex</i>          | A0A127DB63 |
|                              | <i>C. baratii</i>          | A0A0A7FUF6 |
|                              | <i>C. drakei</i>           | A0A2U8DT63 |
|                              | <i>B. nakamurai</i>        | A0A150F9V4 |
|                              | <i>B. megaterium</i>       | D5DCB1     |
|                              | <i>P. aeruginosa</i>       | Q9HX16     |
| <b>Figure 3A</b>             | <i>H. salinarum</i>        | Q9HQP1     |
|                              | <i>H. volcanii</i>         | A0A558GE34 |
|                              | <i>S. rubrum</i>           | A0A2I8VIS1 |
|                              | <i>H. walsbyi</i>          | U1PMD6     |
|                              | <i>H. borinquense</i>      | A0A6G9MFC0 |
|                              | <i>H. inordinatus</i>      | A0A1I2PR27 |
| <b>Extended data fig. 5a</b> | <i>L. pentosiphilus</i>    | A0A1Z5IL31 |
|                              | <i>L. paracollinoides</i>  | A0A1B2IX91 |
|                              | <i>L. suebicus</i>         | A0A0R1W5I3 |
|                              | <i>L. casei</i>            | K6Q4L5     |
|                              | <i>P. sp. Soil766</i>      | A0A0Q9PMV8 |
|                              | <i>P. whitsoniae</i>       | A0A430JDZ5 |
|                              | <i>P. polymyxa</i>         | E3E4F9     |
|                              | <i>S. scp. 75</i>          | A0A3D9NMI5 |
| <b>Extended data fig. 5b</b> | <i>B. glycinfermentans</i> | A0A1C3SHT6 |
|                              | <i>B. shackletonii</i>     | A0A0Q3WW54 |
|                              | <i>P. putida</i>           | R9V9H3     |
|                              | <i>P. indica</i>           | A0A1G9ATL5 |
|                              | <i>P. kribbensis</i>       | A0A4Y8VBJ8 |
|                              | <i>P. pectinilyticus</i>   | A0A1C1A1K2 |
|                              | <i>P. ginsengarvi</i>      | A0A3B0CM75 |
|                              | <i>P. ferrarius</i>        | A0A1V4HKY6 |
| <b>Extended data fig. 5d</b> | <i>S. nanhensis</i>        | A0A1E7LPD7 |
|                              | <i>S. carminius</i>        | A0A2M8M1J9 |
|                              | <i>S. filamentosus</i>     | D6AIM5     |
|                              | <i>S. spTverLS-915</i>     | A0A1C4J7J3 |
|                              | <i>S. himastatinicus</i>   | D9WFT4     |
|                              | <i>P. odorifer</i>         | A0A1R0ZHQ8 |
|                              | <i>P. cellulosityticus</i> | A0A2V2YUK8 |
|                              | <i>P. macerans</i>         | A0A090ZGU8 |
| <b>Extended data fig. 6a</b> | <i>H. volcanii</i>         | D4GYH6     |
| <b>Extended data fig. 6c</b> | <i>H. desulfuricum</i>     | A0A343TMB0 |
|                              | <i>H. persicus</i>         | A0A1H3MBV2 |
|                              | <i>H. salinus</i>          | A0A368ND00 |
|                              | <i>H. spMBLA0076</i>       | A0A6A8GHZ9 |
|                              | <i>H. limi</i>             | A0A1I6GGR4 |
|                              | <i>H. aquaticum</i>        | A0A1I3B2G6 |
|                              | <i>H. elongans</i>         | MOHQX5     |
| <i>H. spCB1230</i>           | A0A7D5C923                 |            |

**Supplementary Table 4 Strains used in this study**

| <b>Strain</b> | <b>Background</b>          | <b>Genotype</b>                                                                                                                    | <b>Source</b> | <b>Figure</b>                               |
|---------------|----------------------------|------------------------------------------------------------------------------------------------------------------------------------|---------------|---------------------------------------------|
| ATP001        | <i>S. aureus</i><br>RN4220 | wild-type                                                                                                                          | 1             | 2cde,4a,<br>ED4bc,ED7c,<br>ED9abc,<br>ED10a |
| BDR2660       | <i>B. subtilis</i><br>PY79 | <i>sacA::Pveg-mTagBFP (phleo)</i>                                                                                                  | Unpublished   | 4a,ED7c                                     |
| BIR003        | <i>B. subtilis</i><br>PY79 | wild-type                                                                                                                          | 2             | 2a,ED2h,<br>ED7ab,<br>ED8ab,<br>ED10b       |
| BIR019        | <i>B. subtilis</i><br>PY79 | $\Delta(\text{sigM-yhdL-yhdK})::\text{erm}$                                                                                        | This study    | ED2h                                        |
| BIR0334       | <i>B. subtilis</i><br>PY79 | <i>sacA::Pveg-mTagBFP (phleo)</i> ,<br><i>amyE::Pamj-yfp (cat)</i>                                                                 | This study    | 2bf,4bc,ED2b,<br>ED3a                       |
| BIR0634       | <i>B. subtilis</i><br>PY79 | <i>sacA::Pveg-mTagBFP (phleo)</i> ,<br><i>amyE::Pamj-yfp (cat)</i> , <i>ycgO::Pspank-</i><br><i>uppS (spec)</i> , <i>uppS::tet</i> | This study    | ED3a                                        |
| BIR0644       | <i>B. subtilis</i><br>PY79 | <i>sacA::Pveg-mTagBFP (phleo)</i> ,<br><i>amyE::Pamj-yfp (cat)</i> , <i>yngC::erm</i>                                              | This study    | 2b,ED2h,<br>ED3ac                           |
| BIR0645       | <i>B. subtilis</i><br>PY79 | <i>sacA::Pveg-mTagBFP (phleo)</i> ,<br><i>amyE::Pamj-yfp (cat)</i> , <i>ykoX::kan</i>                                              | This study    | 2b,ED3c                                     |
| BIR0646       | <i>B. subtilis</i><br>PY79 | <i>sacA::Pveg-mTagBFP (phleo)</i> ,<br><i>amyE::Pamj-yfp (cat)</i> , <i>ybfM::tet</i>                                              | This study    | ED3c                                        |
| BIR0648       | <i>B. subtilis</i><br>PY79 | <i>sacA::Pveg-mTagBFP (phleo)</i> ,<br><i>amyE::Pamj-yfp (cat)</i> , <i>yngC::erm</i> ,<br><i>ykoX::kan</i>                        | This study    | 2bf,4bc,ED2b                                |
| BIR0650       | <i>B. subtilis</i><br>PY79 | <i>sacA::Pveg-mTagBFP (phleo)</i> ,<br><i>amyE::Pamj-yfp (cat)</i> ,<br><i>ycgO::Phyperspank-yngC (spec)</i>                       | This study    | 2b                                          |
| BIR0672       | <i>B. subtilis</i><br>PY79 | <i>sacA::Pveg-mTagBFP (phleo)</i> ,<br><i>amyE::Pamj-yfp (cat)</i> , <i>yngC::tet</i>                                              | This study    | ED3d                                        |
| BIR0683       | <i>S. aureus</i><br>RN4220 | $\Delta 02816::\text{spec}$                                                                                                        | This study    | 2cd                                         |
| BIR0688       | <i>S. aureus</i><br>RN4220 | $\Delta 00846::\text{kan}$                                                                                                         | This study    | 2cd                                         |
| BIR0691       | <i>S. aureus</i><br>RN4220 | <i>attB::Ptet-02816 (cat)</i>                                                                                                      | This study    | 2c                                          |
| BIR0695       | <i>S. aureus</i><br>RN4220 | <i>attB::Ptet-00846 (cat)</i>                                                                                                      | This study    | 2c                                          |

|         |                            |                                                                                                                                 |            |                                         |
|---------|----------------------------|---------------------------------------------------------------------------------------------------------------------------------|------------|-----------------------------------------|
| BIR0712 | <i>B. subtilis</i><br>PY79 | <i>sacA::Pveg-mTagBFP (phleo), amyE::Pamj-yfp (cat), yngC::lox72, ykoX::lox72, ybfM::lox72, yhjE::kan, yqeD::erm, ytxB::tet</i> | This study | 2b                                      |
| BIR0715 | <i>S. aureus</i><br>RN4220 | <i>Δ02816::spec, Δ00846::kan</i>                                                                                                | This study | 2cde,<br>4abc,ED7c,<br>ED9abc,<br>ED10a |
| BIR0769 | <i>B. subtilis</i><br>PY79 | <i>sacA::Pveg-mTagBFP (phleo), amyE::Pamj-yfp (cat), bceAB::kan</i>                                                             | This study | ED9e                                    |
| BIR0852 | <i>B. subtilis</i><br>PY79 | <i>sacA::Pveg-mTagBFP (phleo), amyE::Pamj-yfp (cat), ycgO::Pspank-ispH (spec), ispH::kan</i>                                    | This study | ED3a                                    |
| BIR1113 | <i>B. subtilis</i><br>PY79 | <i>sacA::Pveg-mTagBFP (phleo), amyE::Pamj-yfp (cat), yngC::erm, ykoX::kan, ycgO::Phyperspank-yngC (spec)</i>                    | This study | 2f,4b,ED2b                              |
| BIR1114 | <i>B. subtilis</i><br>PY79 | <i>sacA::Pveg-mTagBFP (phleo), amyE::Pamj-yfp (cat), yngC::erm, ykoX::kan, ycgO::Phyperspank-ykoX (spec)</i>                    | This study | 2f                                      |
| BIR1116 | <i>B. subtilis</i><br>PY79 | <i>sacA::Pveg-mTagBFP (phleo), amyE::Pamj-yfp (cat), yngC::erm, ykoX::kan, ycgO::Phyperspank-02816 (spec)</i>                   | This study | 2f                                      |
| BIR1117 | <i>B. subtilis</i><br>PY79 | <i>sacA::Pveg-mTagBFP (phleo), amyE::Pamj-yfp (cat), yngC::erm, ykoX::kan, ycgO::Phyperspank-00846 (spec)</i>                   | This study | 2f                                      |
| BIR1118 | <i>B. subtilis</i><br>PY79 | <i>sacA::Pveg-mTagBFP (phleo), amyE::Pamj-yfp (cat), yngC::erm, ykoX::kan, ycgO::Phyperspank-yghB(Ec) (spec)</i>                | This study | ED9d                                    |
| BIR1119 | <i>B. subtilis</i><br>PY79 | <i>sacA::Pveg-mTagBFP (phleo), amyE::Pamj-yfp (cat), yngC::erm, ykoX::kan, ycgO::Phyperspank-yqjA(Ec) (spec)</i>                | This study | ED9d                                    |
| BIR1120 | <i>B. subtilis</i><br>PY79 | <i>sacA::Pveg-mTagBFP (phleo), amyE::Pamj-yfp (cat), yngC::erm, ykoX::kan, ycgO::Phyperspank-yngC-his10 (spec)</i>              | This study | ED2bc                                   |

|         |                            |                                                                                                                                 |            |                    |
|---------|----------------------------|---------------------------------------------------------------------------------------------------------------------------------|------------|--------------------|
| BIR1132 | <i>B. subtilis</i><br>PY79 | <i>sacA::Pveg-mTagBFP (phleo), amyE::Pamj-yfp (cat), yngC::erm, ykoX::kan, ycgO::Phyperspank-yngC(R112A)-his10 (spec)</i>       | This study | ED2bc              |
| BIR1133 | <i>B. subtilis</i><br>PY79 | <i>sacA::Pveg-mTagBFP (phleo), amyE::Pamj-yfp (cat), yngC::erm, ykoX::kan, ycgO::Phyperspank-yngC(R118A)-his10 (spec)</i>       | This study | ED2bc              |
| BIR1134 | <i>B. subtilis</i><br>PY79 | <i>sacA::Pveg-mTagBFP (phleo), amyE::Pamj-yfp (cat), yngC::erm, ykoX::kan, ycgO::Phyperspank-yngC(R112A,R118A)-his10 (spec)</i> | This study | ED2bc              |
| BIR1172 | <i>B. subtilis</i><br>PY79 | <i>sacA::Pveg-mTagBFP (phleo), yngC::erm, ykoX::kan</i>                                                                         | This study | ED8ab,ED9ac, ED10b |
| BIR1186 | <i>B. subtilis</i><br>PY79 | <i>sacA::Pveg-mTagBFP (phleo), yngC::erm, ykoX::kan, ycgO::Phyperspank-yngC(spec)</i>                                           | This study | 4a,ED7c, ED8ab     |
| BIR1187 | <i>B. subtilis</i><br>PY79 | <i>sacA::Pveg-mTagBFP (phleo), yngC::erm, ykoX::kan, ycgO::Phyperspank-00846 (spec)</i>                                         | This study | 4a,ED7c, ED8ab     |
| BIR1191 | <i>B. subtilis</i><br>PY79 | <i>sacA::Pveg-mTagBFP (phleo), yngC::erm, ykoX::kan, ycgO::Phyperspank-02816 (spec)</i>                                         | This study | ED8c               |
| BIR1193 | <i>B. subtilis</i><br>PY79 | <i>sacA::Pveg-mCherry (phleo), ykoX::kan, yngC::erm</i>                                                                         | This study | 4a,ED8cd, ED9b     |
| BIR1200 | <i>B. subtilis</i><br>PY79 | <i>yngC::tet</i>                                                                                                                | This study | ED8ab              |
| BIR1211 | <i>B. subtilis</i><br>PY79 | <i>(PsigM-Loopout)-yngC</i>                                                                                                     | This study | ED2h               |
| BIR1218 | <i>B. subtilis</i><br>PY79 | <i>sacA::Pveg-mTagBFP (phleo), amyE::Pamj-yfp (cat), yngC::erm, ykoX::kan, ycgO::Phyper-uptA(A.baumannii) (spec)</i>            | This study | 4b                 |
| BIR1219 | <i>B. subtilis</i><br>PY79 | <i>sacA::Pveg-mTagBFP (phleo), yngC::erm, ykoX::kan, ycgO::Phyperspank-popT(B.burgdorferi) (spec)</i>                           | This study | 4c                 |
| BIR1227 | <i>B. subtilis</i><br>PY79 | <i>sacA::Pveg-mTagBFP (phleo), yngC::erm, ykoX::kan, ycgO::Phyperspank-popT(C.glutamicum) (spec)</i>                            | This study | 4c                 |
| BIR1232 | <i>B. subtilis</i><br>PY79 | <i>amyE::PyngC-optRBS-(ATG)-yfp (cat), sacA::Pveg-mTag-BFP(phleo)</i>                                                           | This study | ED2fg              |

|         |                            |                                                                                                                                                              |            |          |
|---------|----------------------------|--------------------------------------------------------------------------------------------------------------------------------------------------------------|------------|----------|
| BIR1233 | <i>B. subtilis</i><br>PY79 | <i>amyE::PyngC-optRBS-(ATG)-yfp (cat)</i> ,<br><i>Δmlk::erm</i> , <i>sacA::Pveg-mTag-BFP(phleo)</i>                                                          | This study | ED2fg    |
| BIR1252 | <i>B. subtilis</i><br>PY79 | <i>sacA::Pveg-mTagBFP (phleo)</i> ,<br><i>amyE::Pamj-yfp (cat)</i> , <i>ycgO::Pspank-uppS(spec)</i> , <i>uppS::tet</i> , <i>yngC::kan</i>                    | This study | ED3a     |
| BIR1259 | <i>B. subtilis</i><br>PY79 | <i>sacA::Pveg-mTagBFP (phleo)</i> ,<br><i>amyE::Pamj-yfp (cat)</i> , <i>ycgO::Pspank-ispH (spec)</i> , <i>ispH::kan</i> , <i>yngC::tet</i>                   | This study | ED3a     |
| BIR1262 | <i>B. subtilis</i><br>PY79 | <i>sacA::Pveg-mTagBFP (phleo)</i> ,<br><i>amyE::Pamj-yfp (cat)</i> , <i>bceAB::kan</i> ,<br><i>bcrC::erm</i>                                                 | This study | ED9e     |
| BIR1263 | <i>B. subtilis</i><br>PY79 | <i>sacA::Pveg-mTagBFP (phleo)</i> ,<br><i>amyE::Pamj-yfp (cat)</i> , <i>bceAB::kan</i> ,<br><i>uppP::erm</i>                                                 | This study | ED9e     |
| BIR1266 | <i>B. subtilis</i><br>PY7  | <i>bceAB::kan</i> , <i>yngC::tet</i>                                                                                                                         | This study | ED9e     |
| BIR1267 | <i>B. subtilis</i><br>PY79 | <i>sacA::Pveg-mTagBFP (phleo)</i> ,<br><i>amyE::Pamj-yfp (cat)</i> , <i>yngC::erm</i> ,<br><i>ykoX::kan</i> , <i>ycgO::Phyperspank-dedA(E.coli) (spec)</i>   | This study | 4b, ED8c |
| BIR1269 | <i>B. subtilis</i><br>PY79 | <i>sacA::Pveg-mTagBFP (phleo)</i> ,<br><i>amyE::Pamj-yfp (cat)</i> , <i>yngC::erm</i> ,<br><i>ykoX::kan</i> , <i>ycgO::Phyperspank-uptA(B.cereus) (spec)</i> | This study | 4b       |
| BIR1270 | <i>B. subtilis</i><br>PY79 | <i>sacA::Pveg-mTagBFP (phleo)</i> ,<br><i>yngC::erm</i> , <i>ykoX::kan</i> ,<br><i>ycgO::Phyperspank-popT(E.faecium) (spec)</i>                              | This study | 4c       |
| BIR1273 | <i>B. subtilis</i><br>PY79 | <i>sacA::Pveg-mTagBFP (phleo)</i> ,<br><i>amyE::Pamj-yfp (cat)</i> , <i>yngC::erm</i> ,<br><i>ykoX::kan</i> , <i>ycgO::Phyperspank-yabl(E.coli) (spec)</i>   | This study | ED9d     |
| BIR1274 | <i>B. subtilis</i><br>PY79 | <i>sacA::Pveg-mTagBFP (phleo)</i> ,<br><i>amyE::Pamj-yfp (cat)</i> , <i>yngC::erm</i> ,<br><i>ykoX::kan</i> , <i>ycgO::Phyperspank-yohD(E.coli) (spec)</i>   | This study | ED9d     |
| BIR1275 | <i>B. subtilis</i><br>PY79 | <i>sacA::Pveg-mTagBFP (phleo)</i> ,<br><i>amyE::Pamj-yfp (cat)</i> , <i>yngC::erm</i> ,<br><i>ykoX::kan</i> , <i>ycgO::Phyperspank-ydjX(E.coli) (spec)</i>   | This study | ED9d     |

|         |                            |                                                                                                                      |            |          |
|---------|----------------------------|----------------------------------------------------------------------------------------------------------------------|------------|----------|
| BIR1276 | <i>B. subtilis</i><br>PY79 | <i>sacA::Pveg-mTagBFP (phleo), amyE::Pamj-yfp (cat), yngC::erm, ykoX::kan, ycgO::Phyperspank-ydjZ(E.coli) (spec)</i> | This study | ED9d     |
| BIR1277 | <i>B. subtilis</i><br>PY79 | <i>sacA::Pveg-mTagBFP (phleo), amyE::Pamj-yfp (cat), yngC::erm, ykoX::kan, ycgO::Phyperspank-yqaA(E.coli) (spec)</i> | This study | ED9d     |
| BIR1279 | <i>S. aureus</i><br>RN4220 | <i>attB::Ptet-02816 (cat), Δ02816::spec, Δ00846::kan</i>                                                             | This study | 2cd      |
| BIR1280 | <i>S. aureus</i><br>RN4220 | <i>attB::Ptet-00846 (cat), Δ02816::spec, Δ00846::kan</i>                                                             | This study | 2cd      |
| BIR1300 | <i>B. subtilis</i><br>PY79 | <i>sacA::Pveg-mTagBFP (phleo), amyE::Pamj-yfp (cat), bceAB::kan, ycgO::Phyperspank-bcrC (spec)</i>                   | This study | ED9e     |
| BIR1301 | <i>B. subtilis</i><br>PY79 | <i>sacA::Pveg-mTagBFP (phleo), amyE::Pamj-yfp (cat), bceAB::kan ycgO::Phyperspank-uppP (spec)</i>                    | This study | ED9e     |
| BIR1302 | <i>B. subtilis</i><br>PY79 | <i>sacA::Pveg-mTagBFP (phleo), amyE::Pamj-yfp (cat), bceAB::kan ycgO::Phyperspank-yngC (spec)</i>                    | This study | ED9e     |
| BIR1305 | <i>B. subtilis</i><br>PY79 | <i>sacA::Pveg-mTagBFP (phleo), yngC::erm, ykoX::kan, ycgO::Phyperspank-popT(S.pneumoniae) (spec)</i>                 | This study | 4c, ED8d |
| BIR1306 | <i>B. subtilis</i><br>PY79 | <i>sacA::Pveg-mTagBFP (phleo), yngC::erm, ykoX::kan, ycgO::Phyperspank-popT(V.cholerae) (spec)</i>                   | This study | 4c, ED8d |
| BIR1307 | <i>B. subtilis</i><br>PY79 | <i>sacA::Pveg-mTagBFP (phleo), yngC::erm, ykoX::kan, ycgO::Phyperspank-popT(B.cereus) (spec)</i>                     | This study | 4c, ED8d |
| BIR1308 | <i>B. subtilis</i><br>PY79 | <i>sacA::Pveg-mTagBFP (phleo), yngC::erm, ykoX::kan, ycgO::Phyperspank -uptA(P.aeruginosa) (spec)</i>                | This study | 4b, ED8c |
| BIR1309 | <i>B. subtilis</i><br>PY79 | <i>sacA::Pveg-mTagBFP (phleo), yngC::erm, ykoX::kan, ycgO::Phyperspank-dedA(E.coli) (spec)</i>                       | This study | 4b       |



|         |                            |                                                                                                |            |       |
|---------|----------------------------|------------------------------------------------------------------------------------------------|------------|-------|
| BIR1310 | <i>B. subtilis</i><br>PY79 | <i>sacA::Pveg-mTagBFP (phleo), amyE::Pamj-yfp (cat), yqeD::erm</i>                             | This study | ED3c  |
| BIR1311 | <i>B. subtilis</i><br>PY79 | <i>sacA::Pveg-mTagBFP (phleo), amyE::Pamj-yfp (cat), yhjE::kan</i>                             | This study | ED3c  |
| BIR1312 | <i>B. subtilis</i><br>PY79 | <i>sacA::Pveg-mTagBFP (phleo), amyE::Pamj-yfp (cat), ytxB::tet</i>                             | This study | ED3c  |
| BIR1429 | <i>B. subtilis</i><br>PY79 | <i>sacA::Pveg-mCherry, yngC::erm, ycgO::Pspank-rodA-his10(spec), rodA::kan</i>                 | This study | ED3a  |
| BIR1430 | <i>B. subtilis</i><br>PY79 | <i>sacA::Pveg-mCherry(phleo), yngC::erm, ycgO::Pspank-mraY, mraY::tet</i>                      | This study | D3a   |
| BIR1431 | <i>B. subtilis</i><br>PY79 | <i>sacA::Pveg-mCherry (phleo), yngC::erm, ycgO::Pspank-murG(spec), murG::tet</i>               | This study | D3a   |
| BIR1433 | <i>B. subtilis</i><br>PY79 | <i>sacA::Pveg-mCherry, ycgO::Pspank-rodA-his10(spec), rodA::kan</i>                            | This study | D3a   |
| BIR1434 | <i>B. subtilis</i><br>PY79 | <i>sacA::Pveg-mCherry(phleo), ycgO::Pspank-mraY, mraY::tet</i>                                 | This study | D3a   |
| BIR1435 | <i>B. subtilis</i><br>PY79 | <i>sacA::Pveg-mCherry (phleo), ycgO::Pspank-murG(spec), murG::tet</i>                          | This study | D3a   |
| BIR1454 | <i>B. subtilis</i><br>PY79 | <i>sacA::Pveg-mCherry (phleo), ycgO::Phyperspank-yngC(spec),yngC::erm, ykoX::kan</i>           | This study | ED9a  |
| BIR1455 | <i>B. subtilis</i><br>PY79 | <i>sacA::Pveg-mCherry (phleo), ycgO::Phyperspank-SAOUHSC_00846(spec), yngC::erm, ykoX::kan</i> | This study | ED9a  |
| BIR1458 | <i>B. subtilis</i><br>PY79 | <i>sacA::Pveg-gfp (phleo), ycgO::Phyperspank-yngC(spec),yngC::erm, ykoX::kan</i>               | This study | ED9bc |
| BIR1459 | <i>B. subtilis</i><br>PY79 | <i>sacA::Pveg-gfp (phleo), ycgO::Phyperspank-SAOUHSC_00846(spec), yngC::erm, ykoX::kan</i>     | This study | ED9bc |
| BIR1467 | <i>S. aureus</i><br>RN4220 | <i>pLow-empty(erm)</i>                                                                         | This study | ED4d  |
| BIR1468 | <i>S. aureus</i><br>RN4220 | <i>pLow-uppS(ermR)</i>                                                                         | This study | ED4d  |
| BIR1469 | <i>S. aureus</i><br>RN4220 | <i>pLow-murA(ermR)</i>                                                                         | This study | ED4d  |

|         |                            |                                                                                                                                |            |          |
|---------|----------------------------|--------------------------------------------------------------------------------------------------------------------------------|------------|----------|
| BIR1473 | <i>S. aureus</i><br>RN4220 | $\Delta 02816::spec, \Delta 00846::kan,$<br><i>attB::Ptet-00846 (cat), pLow-</i><br><i>empty(ermR)</i>                         | This study | ED4d     |
| BIR1474 | <i>S. aureus</i><br>RN4220 | $\Delta 02816::spec, \Delta 00846::kan,$<br><i>attB::Ptet-00846 (cat), pLow-</i><br><i>uppS(ermR)</i>                          | This study | ED4d     |
| BIR1475 | <i>S. aureus</i><br>RN4220 | $\Delta 02816::spec, \Delta 00846::kan,$<br><i>attB::Ptet-00846 (cat), pLow-</i><br><i>murA(ermR)</i>                          | This study | ED4d     |
| BIR1476 | <i>S. aureus</i><br>RN4220 | $\Delta 00901::scar$                                                                                                           | This study | 2d       |
| BIR1478 | <i>S. aureus</i><br>RN4220 | $\Delta 00901::scar, \Delta 02816::spec,$<br>$\Delta 00846::kan, attB::Ptet-02816 (cat)$                                       | This study | 2d       |
| BIR1481 | <i>S. aureus</i><br>RN4220 | $\Delta 00901::scar, \Delta 02816::spec,$<br>$\Delta 00846::kan, attB::Ptet-00846 (cat)$                                       | This study | 2d       |
| BIR1489 | <i>S. aureus</i><br>RN4220 | $00901::scar, \Delta 02816::spec,$<br>$\Delta 00846::kan, attB::Ptet-00846 (cat),$<br><i>pLow-empty(ermR)</i>                  | This study | 2g, ED4d |
| BIR1490 | <i>S. aureus</i><br>RN4220 | $00901::scar, \Delta 02816::spec,$<br>$\Delta 00846::kan, attB::Ptet-00846 (cat),$<br><i>pLow-uppS(ermR)</i>                   | This study | 2g, ED4d |
| BIR1491 | <i>S. aureus</i><br>RN4220 | $00901::scar, \Delta 02816::spec,$<br>$\Delta 00846::kan, attB::Ptet-00846 (cat),$<br><i>pLow-murA(ermR)</i>                   | This study | 2g, ED4d |
| BIR1492 | <i>B. subtilis</i><br>PY79 | <i>sacA::Pveg-mTagBFP (phleo),</i><br><i>yngC::erm, ykoX::kan,</i><br><i>ycgO::Phyperspank -SAOUHSC_00901</i><br><i>(spec)</i> | This study | 2g       |
| BIR1493 | <i>B. subtilis</i><br>PY79 | <i>sacA::Pveg-mTagBFP (phleo),</i><br><i>yngC::erm, ykoX::kan,</i><br><i>ycgO::Phyperspank -dedA(PC16690)</i><br><i>(spec)</i> | This study | ED5g     |
| BIR1495 | <i>B. subtilis</i><br>PY79 | <i>sacA::Pveg-mTagBFP (phleo),</i><br><i>yngC::erm, ykoX::kan,</i><br><i>ycgO::Phyperspank -dedA(BS18575)</i><br><i>(spec)</i> | This study | ED5f     |
| BIR1500 | <i>B. subtilis</i><br>PY79 | <i>ycgO::Pspank-uppS(spec), uppS:tet</i>                                                                                       | This study | ED7ab    |
| BIR1504 | <i>B. subtilis</i><br>PY79 | <i>ycgO::Phyperspank-uppS(spec)</i>                                                                                            | This study | ED7a     |
| BIR1505 | <i>B. subtilis</i><br>PY79 | <i>sacA::Pveg-mTagBFP (phleo),</i><br><i>yngC::erm, ykoX::kan,</i>                                                             | This study | ED5f     |

|         |                            |                                                                                                                         |            |      |
|---------|----------------------------|-------------------------------------------------------------------------------------------------------------------------|------------|------|
|         |                            | <i>ycgO::Phyperspank -dedA(BS19690)</i><br>(spec)                                                                       |            |      |
| BIR1506 | <i>B. subtilis</i><br>PY79 | <i>sacA::Pveg-mTagBFP (phleo),</i><br><i>yngC::erm, ykoX::kan,</i><br><i>ycgO::Phyperspank -dedA(BS19110)</i><br>(spec) | This study | ED5f |
| BIR1507 | <i>B. subtilis</i><br>PY79 | <i>sacA::Pveg-mTagBFP (phleo),</i><br><i>yngC::erm, ykoX::kan,</i><br><i>ycgO::Phyperspank -dedA(BS15480)</i><br>(spec) | This study | ED5f |
| BIR1508 | <i>B. subtilis</i><br>PY79 | <i>sacA::Pveg-mTagBFP (phleo),</i><br><i>yngC::erm, ykoX::kan,</i><br><i>ycgO::Phyperspank -dedA(BS9915)</i><br>(spec)  | This study | ED5f |
| BIR1509 | <i>B. subtilis</i><br>PY79 | <i>sacA::Pveg-mTagBFP (phleo),</i><br><i>yngC::erm, ykoX::kan,</i><br><i>ycgO::Phyperspank -dedA(BS7270)</i><br>(spec)  | This study | ED5f |
| BIR1510 | <i>B. subtilis</i><br>PY79 | <i>sacA::Pveg-mTagBFP (phleo),</i><br><i>yngC::erm, ykoX::kan,</i><br><i>ycgO::Phyperspank -dedA(BS6870)</i><br>(spec)  | This study | ED5f |
| BIR1511 | <i>B. subtilis</i><br>PY79 | <i>sacA::Pveg-mTagBFP (phleo),</i><br><i>yngC::erm, ykoX::kan,</i><br><i>ycgO::Phyperspank -dedA(BS6295)</i><br>(spec)  | This study | ED5f |
| BIR1512 | <i>B. subtilis</i><br>PY79 | <i>sacA::Pveg-mTagBFP (phleo),</i><br><i>yngC::erm, ykoX::kan,</i><br><i>ycgO::Phyperspank -dedA(PC28030)</i><br>(spec) | This study | ED5g |
| BIR1513 | <i>B. subtilis</i><br>PY79 | <i>sacA::Pveg-mTagBFP (phleo),</i><br><i>yngC::erm, ykoX::kan,</i><br><i>ycgO::Phyperspank -dedA(PC16380)</i><br>(spec) | This study | ED5g |
| BIR1514 | <i>B. subtilis</i><br>PY79 | <i>sacA::Pveg-mTagBFP (phleo),</i><br><i>yngC::erm, ykoX::kan,</i><br><i>ycgO::Phyperspank -dedA(PC15755)</i><br>(spec) | This study | ED5g |
| BIR1515 | <i>B. subtilis</i><br>PY79 | <i>sacA::Pveg-mTagBFP (phleo),</i><br><i>yngC::erm, ykoX::kan,</i><br><i>ycgO::Phyperspank -dedA(PC7440)</i><br>(spec)  | This study | ED5g |

|         |                            |                                                                                                             |            |      |
|---------|----------------------------|-------------------------------------------------------------------------------------------------------------|------------|------|
| BIR1516 | <i>B. subtilis</i><br>PY79 | <i>sacA::Pveg-mTagBFP (phleo),<br/>yngC::erm, ykoX::kan,<br/>ycgO::Phyperspank -dedA(PC5445)</i><br>(spec)  | This study | ED5g |
| BIR1517 | <i>B. subtilis</i><br>PY79 | <i>sacA::Pveg-mTagBFP (phleo),<br/>yngC::erm, ykoX::kan,<br/>ycgO::Phyperspank -dedA(PC4905)</i><br>(spec)  | This study | ED5g |
| BIR1518 | <i>B. subtilis</i><br>PY79 | <i>sacA::Pveg-mTagBFP (phleo),<br/>yngC::erm, ykoX::kan,<br/>ycgO::Phyperspank -dedA(PC28990)</i><br>(spec) | This study | ED5g |

References:

1. Pang, T., Wang, X., Lim, H. C., Bernhardt, T. G. & Rudner, D. Z. The nucleoid occlusion factor Noc controls DNA replication initiation in *Staphylococcus aureus*. *Plos Genet* 13, e1006908 (2017).
2. Youngman, P., Perkins, J. B. & Losick, R. Construction of a cloning site near one end of Tn917 into which foreign DNA may be inserted without affecting transposition in *Bacillus subtilis* or expression of the transposon-borne *erm* gene. *Plasmid* 12, 1–9 (1984).

**Supplementary Table 5 Plasmids used in this study**

| Plasmid | Description                                    | Source     |
|---------|------------------------------------------------|------------|
| pAM155  | amyE::Pamj-yfp(cat)(amp)                       | 1          |
| pDR244  | Ppa-cre, ori(ts) (spec) (amp)                  | 2          |
| pIR211  | ycgO::Pspank-uppS(spec)(amp)                   | This study |
| pIR224  | ycgO::Phyperspank-yngC (spec) (amp)            | This study |
| pIR226  | ycgO::Phyperspank-ykoX (spec) (amp)            | This study |
| pIR233  | ycgO::Phyperspank-bcrC (spec) (amp)            | This study |
| pIR234  | ycgO::Phyperspank-uppP (spec) (amp)            | This study |
| pIR235  | ycgO::Phyperspank-yghB(spec)(amp)              | This study |
| pIR236  | ycgO::Phyperspank-yqjA(spec)(amp)              | This study |
| pIR237  | Pmad3.1-2816::spec (erm)(amp)                  | This study |
| pIR238  | Pmad3.1-846::kan (erm)(amp)                    | This study |
| pIR239  | attB::Ptet-02816 (cat) (amp)                   | This study |
| pIR240  | attB::Ptet-00846 (cat) (amp)                   | This study |
| pIR242  | Himar1C9 IR-specPpen-IR terminators (erm)(amp) | 3          |
| pIR278  | ycgO::Pspank-ispH (spec)(amp)                  | This study |
| pIR352  | ycgO::Phyperspank-yngC-his10 (spec)(amp)       | This study |
| pIR361  | Pmad3.1-PyngC( $\Delta$ PsigM) (erm)(amp)      | This study |
| pIR385  | amyE::PyngC-yfp (cat)(amp)                     | This study |
| pIR388  | ycgO::Phyperspank-popT(Vc) (spec)(amp)         | This study |
| pIR392  | ycgO::Phyperspank-uptA(Ab)(spec)(amp)          | This study |
| pIR393  | ycgO::Phyperspank-popT(Bb) (spec)(amp)         | This study |
| pIR397  | ycgO::Phyperspank-uptA(Pa) (spec)(amp)         | This study |
| pIR399  | ycgO::Phyperspank-popT(Bc) (spec)(amp)         | This study |
| pIR400  | ycgO::Phyperspank-popT(Sp)(spec)(amp)          | This study |
| pIR401  | ycgO::Phyperspank-popT(Cg) (spec)(amp)         | This study |
| pIR403  | ycgO::Phyperspank-dedA(Ec) (spec)(amp)         | This study |
| pIR405  | ycgO::Phyperspank-uptA(Bc) (spec)(amp)         | This study |
| pIR406  | ycgO::Phyperspank-yabl(Ec) (spec)(amp)         | This study |
| pIR407  | ycgO::Phyperspank-yohD(Ec) (spec)(amp)         | This study |
| pIR408  | ycgO::Phyperspank-ydjX(Ec) (spec)(amp)         | This study |
| pIR409  | ycgO::Phyperspank-ydjZ(Ec) (spec)(amp)         | This study |
| pIR410  | ycgO::Phyperspank-yqaA(Ec) (spec)(amp)         | This study |
| pIR411  | ycgO::Phyperspank-popT(Ef) (spec)(amp)         | This study |
| pIR451  | ycgO::Phyperspank-dedA(BS18575)(spec)(amp)     | This study |
| pIR455  | ycgO::Phyperspank-dedA(BS19690)(spec)(amp)     | This study |
| pIR456  | ycgO::Phyperspank-dedA(BS19110)(spec)(amp)     | This study |
| pIR457  | ycgO::Phyperspank-dedA(BS15480)(spec)(amp)     | This study |
| pIR458  | ycgO::Phyperspank-dedA(BS9915)(spec)(amp)      | This study |
| pIR459  | ycgO::Phyperspank-dedA(BS7270)(spec)(amp)      | This study |
| pIR460  | ycgO::Phyperspank-dedA(BS6870)(spec)(amp)      | This study |
| pIR461  | ycgO::Phyperspank-dedA(BS6295)(spec)(amp)      | This study |

|        |                                            |              |
|--------|--------------------------------------------|--------------|
| pIR449 | ycgO::Phyperspank-dedA(PC16690)(spec)(amp) | This study   |
| pIR462 | ycgO::Phyperspank-dedA(PC28990)(spec)(amp) | This study   |
| pIR463 | ycgO::Phyperspank-dedA(PC28030)(spec)(amp) | This study   |
| pIR464 | ycgO::Phyperspank-dedA(PC16380)(spec)(amp) | This study   |
| pIR465 | ycgO::Phyperspank-dedA(PC15755)(spec)(amp) | This study   |
| pIR466 | ycgO::Phyperspank-dedA(PC7440)(spec)(amp)  | This study   |
| pIR467 | ycgO::Phyperspank-dedA(PC5445)(spec)(amp)  | This study   |
| pIR468 | ycgO::Phyperspank-dedA(PC4905)(spec)(amp)  | This study   |
| pIR448 | ycgO::Phyperspank-SAOUHSC_00901(spec)(amp) | This study   |
| pIR232 | ycgO::Phyperspank-SAOUHSC_00846(spec)(amp) | This study   |
| pIR230 | ycgO::Phyperspank-SAOUHSC_02816(spec)(amp) | This study   |
| pIR445 | pMAD3.1-SAOUHSC_00901::scar (erm)(amp)     | This study   |
| pIR441 | pLow-Pspac-uppS(erm)(amp)                  | This study   |
| pIR442 | Plow-Pspac-murA(erm)(amp)                  | This study   |
| pLow   | Pspac-MCS, Lacl (erm)(amp)                 | <sup>4</sup> |

#### References:

1. Meeske, A. J. *et al.* MurJ and a novel lipid II flippase are required for cell wall biogenesis in *Bacillus subtilis*. *Proc National Acad Sci* 112, 6437–6442 (2015).
2. Wang, X. *et al.* Condensin promotes the juxtaposition of DNA flanking its loading site in *Bacillus subtilis*. *Gene Dev* 29, 1661–1675 (2015).
3. Dobihal, G. S., Flores-Kim, J., Roney, I. J., Wang, X. & Rudner, D. Z. The WalR-Walk signaling pathway modulates the activities of both CwIO and LytE through control of the peptidoglycan deacetylase PdaC in *Bacillus subtilis*. *J Bacteriol* JB0053321 (2021) doi:10.1128/jb.00533-21.
4. Liew, A. T. F. *et al.* A simple plasmid-based system that allows rapid generation of tightly controlled gene expression in *Staphylococcus aureus*. *Microbiology+* 157, 666–676 (2011).

**Supplementary Table 7 gBlocks used in this study**

| gBlock  | Sequence                                                                                                                                                                                                                                                                                                                                                                                                                                                                                                                                                                                                                                                                                                                                                                                                                                                                                                                                                                                                                                                                                       |
|---------|------------------------------------------------------------------------------------------------------------------------------------------------------------------------------------------------------------------------------------------------------------------------------------------------------------------------------------------------------------------------------------------------------------------------------------------------------------------------------------------------------------------------------------------------------------------------------------------------------------------------------------------------------------------------------------------------------------------------------------------------------------------------------------------------------------------------------------------------------------------------------------------------------------------------------------------------------------------------------------------------------------------------------------------------------------------------------------------------|
| Vc.popT | <p>AATTGTGAGCGGATAACAATTAAGCTTacataaggaggaactactATGAATTACTTATCCAATTATTTAAAGGGTCTG<br/> GCAATGGGTGCGGCCGATGTGGTCCCAGGGGTATCCGGCGGGACGATAGCTTTTATTACGGGAATATACGACA<br/> CTTTACTTGAGAGCATTCCGCCGTATAAACCCAAGTCTGCTGAAAGTGTGGAAAGCGCAAGGGTTAGCGGGTGT<br/> TTTTCGGCATATCAATGGGCTGTTTCTCATCACGTTGTTGCGCGGGATCTTTACTTCTATTGCTACTTTAGCCAAG<br/> TTAATTAGCTGGCTCTTAGTTACCCATCCGATTCCGATTTGGAGTTTCTTCTTTGGTCTGATACTGGTTTCCGTAT<br/> GGCAGATGTTGCGTCAAATCGAACAGAAGAAGCTCTCCCGCTCCTGTGGTTAATAGCTGGTGAATTTTCGCT<br/> TACGGTATAACTGTGTTAAAACCATTCATTTGGAACCAACCTACATAAACGTTCTGATTTCCGGCGCAATAGCA<br/> ATATGTGCAATGATTTTACCAGGAATTAGTGGTCCCTTCTTTACTGATAGGTATGTACGCCCAAGTTTGG<br/> GGGCGTTAAGACTTTCCAGCTCGACATACTCCTGATCTTTCTACTGGGTGTGTAATTGGCCTGCTCAGTTTTTC<br/> TCATATCTTAAGCTGGCTCCTCCGAGATATCGTGACGTTACACTCACTTTCTAACGGGTTTGTATTTGGGAAC<br/> TCTGCCAAAGATCTGGCCGTGGAAAGAAACGCTGTCTTGGCGGGTAAATCAAGCGGAGAACAAGTGCCTCTT<br/> CTTCAACGCAATCTCAGTCCATTGAATTTGAGACTCTGACTAGCCAACCTTCCAGTGTTGCTTGCCTTAGTC<br/> CTTATGCTTGACAGCAGTGGCGCTTGCTTGGTTGGAGAAATATGCTGAAAAATAAACTAGTaaCTGCAGatGC<br/> TAGCtcGCATGC</p> |
| Pa.uptA | <p>AATTGTGAGCGGATAACAATTAAGCTTacataaggaggaactactATGGATTTCAATCCTATCGACTTGATATTGCACT<br/> TAGACACCTATCTTGCCATGCTTGTTAGTAATTATGGCGTCTGGATATATGCGATATTGTTTCTGGTTATTTTTTG<br/> CGAGACGGGTCTCGTGGTGACACCGTTCCTGCCTGGCGATTCTTGTCTTTATAGCGGGCGCTATATGTGCTA<br/> CGGGAGGCATGGACCTTGGCTTCTGGGCGGACTTTTAAATGGTTGCGGCCATAACCGGAGATAGCACTAATTA<br/> CGTCATCGGACGGACATTGGGGAAAAGACTTTTTTCTAATCCTGATAGCAAAGTTTTTAGACGTGATTATTTAGA<br/> CCGCACCCATGAGTTTTATGAGCGGCATGGAGGGAAGACCGTTACCTTAGCCCGCTTCTCCAATAGTTAGAA<br/> CATTTGCGCCTTTTGTGCGCCGAATGGCCAAGATGCACTACCCAAGATTCGTAATGTTTTCTGTAGTGGGCACC<br/> GTGGCTTGGTTCGGTGGCTTGGTCACTTATAGGTACTTTTTCGGGAATGTGCCTTTCATCAAGAAGAAGTTATC<br/> CCTTCTGGTGATAGGTATTATCCTTTTGTCTTGTCCCAATGATACTGGGATTCACTCGGCATCGCTGCAAGCC<br/> AGTGACGAAAGCAAGCAAGGCTCAGAGCGATTAAGTaaCTGCAGatGCTAGCtcGCATGC</p>                                                                                                                                                                                                                                                                          |
| Bb.popT | <p>AATTGTGAGCGGATAACAATTAAGCTTacataaggaggaactactATGTTAAATATATACATTAAGGCATACTGCTT<br/> GGGATTGCCAACATAATACCAGGGGTCTCTGGAGGGACCTGGCATTGATCCTTAAAATATATTACAAGATCAT<br/> TAACTCTATTAGTGAGATATTGAAGCTTACAGAGATCAAGAAGAACCTGATGTTCTCACTATATTGGCTACTGG<br/> AATGTTGACCAGCATTCTCCTTACGGCGAAAATCTTCAAGACTTACGTTTTGACAATGCATTATAGAGGCGTT<br/> GCTCATCGTATTTTTATAGGTCTTGCCTCGGCAATATTCTGACGTTAAAAACCGAGATCAGCATCAAGGAAAT<br/> TAACAGCAACACCAAAATTCTTAATAACCTGCTTTTTTTCATTGGTATGTCTATCATAGTCTTATTCTTAATCTTGA<br/> AGGAATCAAACATCCAGTTGCAGAGCACCATCCCGAAGGATAAGAACAGTATCAAGTACTATCTTTTACTCATA<br/> AGTAGTGGGACAATATCCGGGGCAAGTATGATACTGCCTGGAATCTCCGGGTCCGCGATGTTATTGCTTCTTGG<br/> ATTCTATAAAGAGATCATATTGATTGTATCTGAGTTCAATATCATATTGATTACTATATTGCGCCGCGCAGCGAC<br/> GATGGGTATTATAACGTCAATCTTAATAATTAATAAATCATCGACAAACATTTGAACAACCTCATCTATCTTAG<br/> CAAGGGGTTAATCTTCCGCTCAATCTTCAAATGATCCTTATCGTCCTTAAACTCAATTTCAAATCGGATTTACG<br/> TCCTTACGCTTTTAGGCACGAGTTTCATACTTGGCATTTTTATAAATAAAAAACTTGGCGGAGAAGTATAAATAA<br/> ACTAGTaaCTGCAGatGCTAGCtcGCATGC</p>                                                     |
| Ef.popT | <p>AATTGTGAGCGGATAACAATTAAGCTTacataaggaggaactactATGGAGAAGCAGCGGAATGAAAGTATATTATC<br/> ACGGTTCCTGAAAGGAGTTGTTATCGCTCTTGGGTTTATACTCCAGGCGTGTCCGGTGGGGTCTTGTCTGCGA<br/> TACTCGGCATATACGAACGGATGCTCCGTTTTATGGCACACTTGACCAAAAACCTTAAAGGAAAATCTGCTGTTTT<br/> TTTTACCGGTTGGTATAGGAGGGATAGTCGGTATAGGCTTATTATCTAAACCTCTCGAGTGGCTGCTCCAGAAT<br/> TATCAAATAATAGTATTGTGGGGCTTCGCTGGGGCTATCATTGGGACTCTCCCGGCGCTGGCTAAAGAAAGTAC<br/> GCTGAAGTCAAAAAGAACAACCGGAGACCTTTATGGTTCTTCGGTAGTATGGTATAGGTTTCTCTTTCTGTA<br/> CTTCATGGGAGACATCCTGGGCACTATCCAGCAAATTTTCATCGGTTTTGTTATAGCAGGAGGACTGATCGCTC<br/> TGGGCGTTTTAGTCCCTGGATTATCACCAAGCAATCTGTTACTTGTCTTGGTTTATATGACCCATGTTGAAAG<br/> GATTCAAATCATTGATATAATGGGGGTGTTTCTGCCTATCGCCATCGGTGGACTCGCGGTATGTTGCTTTTCT<br/> CAAAGTTAATGGAATGGCTGTTATCACATTACCATAGCAAAGTGTACCACTTTATACTCGGCATAGTAATCGCTA<br/> GTACAATACTTATTGTTATACCACCGTTCGCGAATTATCCGGGTTTACCTGGGTGACTGCGGTTCATAGGAATA<br/> ATCCTTCTGCTCCTCGGAGCCTGGCTCGGCTTATGGATGTCAAAGCTGGAAGAAAAGTATAAATAAACTAGTaa<br/> CTGCAGatGCTAGCtcGCATGC</p>                                                                 |

|         |                                                                                                                                                                                                                                                                                                                                                                                                                                                                                                                                                                                                                                                                                                                                                                                                  |
|---------|--------------------------------------------------------------------------------------------------------------------------------------------------------------------------------------------------------------------------------------------------------------------------------------------------------------------------------------------------------------------------------------------------------------------------------------------------------------------------------------------------------------------------------------------------------------------------------------------------------------------------------------------------------------------------------------------------------------------------------------------------------------------------------------------------|
| Ab.uptA | <p>AATTGTGAGCGGATAACAATTAAGCTTacataaggaggaactactATGGAACTCTTAGATTTTATACTCCACGTAGAT<br/> CAGCATCTGGCGGAATTTATAACGAACTACGGTACTTGGATTTACGGGATTCTGTTCTTGATTATCTTTGTGGAA<br/> ACTGGTCTCGTCGTAATGCCATTCCTTCCAGGCGATTCTCTGTTGTTGCTGCTGGTGCACCTTGCCGCGTCTACA<br/> GGTACTATAGATCCGTGGCTCTTAGGAATCCTCTGTTTATAGCCGCCGTTCTCGGAGACACCGTGAACATCAT<br/> ATAGGGCGTTTCATAGGCCCGCGCTTTGAGATGAACTCACGGTTTATAAATAAGCAGCACTTAATAAAGAC<br/> GCATGAGTTCTTCGCGCGGCATGGTGGCAAACAATTTTTCGCTCGTTTCATACCTTTGCCCCGACTTTTCGC<br/> GCCATTCGTCGCGGGAGCGGGGAGTATGAACTATAAATTTCTTCTTACTTATAACATAATCGGCGCTTTTGTCTG<br/> GGTTGCCAGCTTTGTACGCTCGGCTATTTATTTGGGGGCCACCCGCTGGTCAAGGACAATTTTACTCACCTTAT<br/> ATTCGGCATTATTATTATTTCAATTTCTTCTGGAGTGATAGGGTTTATCAGACAAAACTCAAAAATCGGAAGGC<br/> GAACGTATAAACTAGTaaCTGCAGatGCTAGCtcGCATGC</p> |
| BS18575 | <p>AATTGTGAGCGGATAACAATTAAGCTTacataaggaggaactactATGGAGAATTGGATCACAGAATTTATGAACGA<br/> TTTCGGCTATATGGGCATCTTTCTTTAATTGCCCTGGAAAATATCTTTCCACCTATACCGAGCGAGGTCATATTA<br/> ACTTTTGGTGGCTTCATGACAACGACTGCCAACATGACTATAATGGGGGTGGTCATCGCCTCCACAATAGGCTC<br/> CGTGCCGGTGGCGTAGTTTTATATGGGATTGGATTACTGTTGGACGTAAAGGTGATCGAGAAGTTCGTGGAA<br/> AGATGGGGACATATATTGCGGCTGACCGTCTCAGACGTCCACAAAGCTAATAGCTGGTTCGATAAATACGGGG<br/> CCTGGACAGTGTTTTTTGCAGACTTGTGCCTCTGATACGCTCTCTGATCTCAATACCTGCGGGTATGTCACACA<br/> TGAGCTTTTGGCTCTTCTCCTGTACACGACCTCTGGAACCTGATTTGGAATATAATTCTCGTAAACATAGGGG<br/> CGCGGTTCGCGAGCTCATGGGAAGATATTGTTGGTTATATGGACATATATAGCAATATAGTGTATGCAATACTT<br/> GCGCTTCTTTTCATCACATTTGTCGTGTTGATCTTTAGACGCAATAAGGGAAAAGTATAAACTAGTaaCTGCAGat<br/> GCTAGCtcGCATGC</p>                          |
| BS19690 | <p>AATTGTGAGCGGATAACAATTAAGCTTacataaggaggaactactATGAACGATAAACTCACCTGGTGATGTCCTAC<br/> GTCCAGTCTGGGTCCGTTTTTGCCTGTTAATATTTTACGTTCCACCTCCTCCGTGAGTTCCTTTTCATTCCGGT<br/> TATCGTGGTGTGTATGTCCGGGGCGTCTTGTTCGCGCTGCCTTTGGCACCATTATTCGTCATTGGCCTCAC<br/> CTTGTCATCAATGGCATTCTATTTCTGATCGGTAAATTTCCGAAAACGAAAGACAGACTGTTGCGCTTAAAA<br/> ACAAGTTGTTGAAACCGTAAGTTAAACTCCCGCCAGATTGCGGTGCTTCGTCCTGATCCATTTCATTCTTTCT<br/> ATCTTCTGAGTCTCTGTCTTTTAGAATCAAATAAAGGACTTAAGAACTACTTCTACCTTAGTTTCATGACGAATCT<br/> CCCGGTGCGGTTTGTATACGGTATTGCGTATTACATCAGTGATTTCTCCCGACTCTTATAGTTATTATCCTC<br/> CTGTCTCTCACACTCCTTTGTATCTGTTGCGGGAAAAGCAGACTGTAGTCCCTTGAAAGAATTTTTCAGAAGT<br/> GACGACTGAACTAGTaaCTGCAGatGCTAGCtcGCATGC</p>                                                                                       |
| BS19110 | <p>AATTGTGAGCGGATAACAATTAAGCTTacataaggaggaactactATGGATATAGTGAAGGACTTGATTTCCAATTAT<br/> GGCTACTTTGCGATCTACGGACTCCTTGCATCGGAATTATAGGTCTGCCTGTACCGGACGAGTTTATGATGAC<br/> GTTCTGTTGGTTATTTATCATCCATCTCAGTGTTAAACGTGCAAGGGGCATTTTATGTTCTTTCCTCGGGAGTAT<br/> CTCAGGAATGCTCATATCATACTTCATTGGAAAAAAGGTGGGTAAGCCATTCTCAGAAAACATGGGAAGTGG<br/> ATCAAAATGACACCTGCCAGACTGGAGAAGCTTGAGAAATGGTTAATAAGTACGGTCCATGGACGATCATAA<br/> TAGCTTACTTCATACCTGGAGTCCGTCATTTTGCTTCTTACATCAGCGAATGAACGGCATGGGCAAGAGAAAG<br/> TACTTCATCTTTGCGGTGCAGGAGCCTTTTCATGGTGCCTTGTTTTACAACATTGGGATACTTTATTGGAGTTC<br/> TTACATGAACTAGTaaCTGCAGatGCTAGCtcGCATGC</p>                                                                                                                                                                     |



|         |                                                                                                                                                                                                                                                                                                                                                                                                                                                                                                                                                                                                                                                                                                                                                                                                                                               |
|---------|-----------------------------------------------------------------------------------------------------------------------------------------------------------------------------------------------------------------------------------------------------------------------------------------------------------------------------------------------------------------------------------------------------------------------------------------------------------------------------------------------------------------------------------------------------------------------------------------------------------------------------------------------------------------------------------------------------------------------------------------------------------------------------------------------------------------------------------------------|
| BS15480 | <p>AATTGTGAGCGGATAACAATTAAGCTTacataaggaggaactactATGAACATCGACACGTTGCTGCATTTTCATAGAC<br/> AGTTACGGCTACCTCATAATCTTCTTATTCTTATTTTTCGGCATTGTCGGAGTACCTGCGCCGGAGGAGTCCCTTC<br/> TGTTTCTCATTGGGGTGTAGTAGTCCAAGGTAAGCTCAGCATGGGGTTAGCCATGTTATGTGCTATACTTGGA<br/> GCTTTTTATTGGAATGCTCGCAGCGTATGCCTGTGGTAAGTACGTCGGCTATCCTTTCATCAACAAATATGGGCG<br/> CTTCATTGGTATTACGTCTGAACGTTGGGAAAAAGCAAAAAAGAATTACACAGACAACGCTGAAAAGACATTG<br/> GTCTTAGGCTTCTACATACCTGGGATCCGGCAGATATCTCCGACTTTGCGGGGATATCTAGCATACCATTCCGC<br/> AAATACTTCTCTTCTAGTCTGCTGGGGACTATACTTTGGACAGTTCATTTATAGTCGCCGGATATTATGTAGGC<br/> GATGCTTTTAAAGTCAACCCAAAATACGTGCCGTACCTGGGCGTTGTATTCTTAGTCATATTTGTTTTGTACGTG<br/> ACTATTAATACTTCAAGAAACGGAAGCAGATGAGTAAATCCTAAACTAGTaaCTGCAGatGCTAGCtcGCATGC</p>                                                                                      |
| BS9915  | <p>AATTGTGAGCGGATAACAATTAAGCTTacataaggaggaactactATGTCTAAAAACGGGGGAGGTCCGTTGAAAA<br/> GGTTTTGACGATCATCGGGTGTCTGTAATCGCAATCTTATCTACTCAAACGCGGAGCTGTTTACACTCGTTTG<br/> GAAAAGCGATCTTGATTCTGTGATAGGAATATTAAGAAAATCTCCTGTTAACGTTTCATAGTTACATTTGTCTT<br/> AATGTTTCGTTCAAAAACAGTTTCACGATCATACCATTGATCTTATTGTTAACGATAAACGTTACTATCTTTGGTTTC<br/> ATCTACGGGTATCTGTGGAGTTGGTTCACCTCCGTCTGGCTAGTGGTTTCATTTTTTATGCTGTTTCGGAATTGG<br/> TTCCAAGAGCTGTTACTGAAGAAGATAGGCCGAAAAGTGGCAAGAGACTGTAGTGGAGCATGGGTTTCATGTAC<br/> GTGTTTACGGGCCGATTTTTCCATTGATCCTACGAGCTTAATCAACCTTCCGCCGGAGTGTCCACTGTGACC<br/> TTTAAGGACTTCTGCTGCTACTGCTTTAGGAACTTAATTTATTTCTTTTTTTGTCACTTATCCCTTATGGACT<br/> CCTGTCAGTAGAAATGAATCAGTATACTTTAGTAGCCTTAGCCCTCTTACCCTGCTGTTCTTCATAATCTACAAG<br/> CGCGGAAGAAAAAGAAAAAATTGACGTTTTTTAGAAAAACCGCTAGACTAGTaaCTGCAGatGCTAGCtcGC<br/> ATGC</p> |
| BS7270  | <p>AATTGTGAGCGGATAACAATTAAGCTTacataaggaggaactactATGAATTTCAATTCAGAAGCACTGTTGAGCTCA<br/> GGCCATTTAGTATCGCGGTATCACTCGTGTCAACATTCTGATAAGTGTTTTAGGCTTCATCCCTAGCGTCTTTA<br/> TAACGGCTGCGAACATTACAGTTTTTGGATTGAGAAAGGGCTGATCCTCAGTTACATGGGCGAGATAGCAGG<br/> TGCAGTCGTGCTCTTCTGTTATACCGTAAGGGCTTTCAGACGTTCAAACCAAAGTTTCATGAAAAATCGTTGGG<br/> TTATGAAATTGAGAAAAGCCAAGGATTCATGCTTTCTGGATGATCCTGATGCTTCGCTCCTTCCGTTTATTCC<br/> GTCTGGTGTATAAATCTCACTGCGGCTCTGAGCAAGACTGGAATGATGATATCTTTCTCGCCACGTCAATCGG<br/> CAAATCCCGCATTGCTTGTGAAAGCGTACTCTGTACCCAAGTCTTGAAGCCTCCGATGATGTTCCGGATAGT<br/> CTTGGTCTTCTTATCCTGGTGATCGCTGTCTTTACTATTTCAACAGAAATAAAAAGAAAGGCATGTAAACTAG<br/> TaaCTGCAGatGCTAGCtcGCATGC</p>                                                                                                                                                 |
| BS6870  | <p>AATTGTGAGCGGATAACAATTAAGCTTacataaggaggaactactATGAGTCAGCTTATGATGACCATACTTAATTGG<br/> TTTGGCGAAATGGGATACATGGGAATTTTATTAGGGCTCATGGTTGAGATATTACCATCAGAATTGGTACTTGG<br/> GTACGGAGGATACCTTGTGGGATTGGGGAAGATGAATTTCTGGGGAGCCGTTTTAGCAGGCGTTGCCGGTGG<br/> AACCATGGCTCAACTGTTCTTGTACTGGGCTGGATATTATGGTGGGCGGCCATTTCTGCTGAAATATGGGAAAT<br/> ATATTCTTATTAAGCAAAACCATATAGTAAACGCGGAAGAATGGTTTTCAACGCTATGGAGTAGGCGTGATCTTC<br/> ACAGCAAGATTCACTCCCTGTGCTTCGCCACGCCATTTCTATACCAGCCGGAATCGCGCGGATGTCCTGATGGAA<br/> GTTTCATCTTCTACACAGTCGCTGCAGTGATCCCATGGACGATCTTATTTCTTACTCTGGGTCGGATATTGGGTGA<br/> AAACTGGCAACAAATTCGTGAAATCACTGAACCATATTAATTCCTGCGGCAGGGTTTTAGTTTTATACTGATAAT<br/> GCTGTACATATTGTGGAAAAAGAAATCAACCCACCTATCGTCACAGTAAAGAAGATGGGTCGGTTCCTGATA<br/> AATAGACTAGTaaCTGCAGatGCTAGCtcGCATGC</p>                                               |

|         |                                                                                                                                                                                                                                                                                                                                                                                                                                                                                                                                                                                                                                                                                                                                                                                |
|---------|--------------------------------------------------------------------------------------------------------------------------------------------------------------------------------------------------------------------------------------------------------------------------------------------------------------------------------------------------------------------------------------------------------------------------------------------------------------------------------------------------------------------------------------------------------------------------------------------------------------------------------------------------------------------------------------------------------------------------------------------------------------------------------|
| BS6295  | <p>AATTGTGAGCGGATAACAATTAAGCTTacataaggaggaactactATGGATCTTGACACAATTAGAGAGTGGTTTACTCTCGACCATATCTCCGAGTTAATTCAGCAATATCGCTCTTTTGGACCGATACCGGGAATATTATTGCCAATGTTGGAAGCATTCTTACCTTTTCTTCCACTCGTCGTTTTCTGTTCTCGCAAACGCTACAGCTTTTGGGCTCTGGTGGGGGTCTTTGTTTTCATGGATTGGCGCGGTGGCTGGTTCACTTCTTATTTTTTGGTGATTGCGCGTTACGGCCAAATGCGTTTTCTTCTGTTTCTTCCAGAAGCACAAGCAAGTTCAGCGCCTCATGGTTGGGTGAGACCCACGGTTTTGGCCGCTTTTTATTCTTCTGTTTCCATTCACTCCAAGTGAATTGTAAATATTGTCGCTGGGCTGTCAAAGTTAGCCCTTGCAGTACGGGCTCGCTGTGGTGGCGGTAAGGCGGTTATGATTTTACCATTTCATTTGTCGGCTACGATTTGGTCTCCCTGATTACATAAGCCGGTACGCACCATTATAATAGGGATTGTCATATTTATTTTATGGTATGTAGGGAAACGTCTGGAAGTTAGATTGAACAAAAGCATGAAGCGCGAAGAAGGTCAGTGAAGTAGTaaCTGCAGatGCTAGCtcGCATGC</p>                                                               |
| PC16690 | <p>AATTGTGAGCGGATAACAATTAAGCTTacataaggaggaactactATGCATCAGCTTATAGACTGGTTCAGTCGGACCGCAATACATTTGATCGACACTTTAGGCCTCACTGGCATTTCATCGGTATGATCCTTGAGTCAGCCTGTATCCCGATCCCTAGTGAAGTAATTCTCCTCGGTGGTGGCGCAGCCTCGCTTTAGGCTCCATGACCTATTGGGGAGTTGTTGCAGCCGGAGTATTCGGCAACCTCGTCGGTAGCATAATCGCATACTATATTGGTGGCCTTGGTGGGAGACGGCTTCTCGAACATAACGGCAAGTATATACTGTTCAAACAAGTCAATTATGAACAAGCGCAGAGATGGTTCGACAGACACGGGGAACTCACTGTCCTTATAGCTCGTAACCTGCCATTTGTTGCGACGTTTATCTCATTACCTGCGGGTATTGCATCCATGCGCGTACTAAATTCATACTTTTTACTTTTTATAGGTTGTATCCCATGGAATATGGCACTCGCGTTCGCCGGATATAAGTTGGGCCAGTCTGACCAGATAGAGCGCATTTCATCCTCTGAGTTACGGGATTGCAGGGATCATTTTGGTAGCAGGGCTCTTCTGGTTATTGAAAAAGCGGAGAGGCATACACTAACTAGTaaCTGCAGatGCTAGCtcGCATGC</p>                                                                 |
| PC28990 | <p>AATTGTGAGCGGATAACAATTAAGCTTacataaggaggaactactATGAACAAACGCAAGCTGATTGTACGTGTGGTCGGGTACATAGCCTTTTACTTTGTTTGTCTATCTGATTGCGTCAAGTGGCTACACGGTGCCTGACCTTACGCCAGACACTATCCGGGAGATAGCTCACGACGATATCATTCTCATCATGTTAATTATGCTCGTTATCATGACCTTGCAAAACATATTTACATTCATACCTCTTATTTTAGTGATTACAGCCAACATCACCTATTTGGTTTCGTTAAAGGATAC TTATACGGATGCCTTTGTTCAAGTATGCGGTTCCACCTGTTTCTCTCCATAAGATATTTATTCATGATGTATT CGCGGGCAGTCTAAGATGCAGCAATTTCAAGAAAAATAGAGAAAAATGGTTTTACTTACGTCTTATTCGGGA GAATCCTGCCGTTAATGCCTACAAATCTTATTAACATAACATCAGGCCTCTCATCAATCCGTACCCTCCATTTGCT TACGGCCACGACAATCGGGAATATGGTCTATGGTTTGGTACTTAGCAGTCTCTTTTGGTTAATCAGCGCCTC CGCGCATAATAGAGTCTATATAATTGCAACGGTAATAGTTGACTTGTATCGTATGGTTATATAGATTGAATAA GCGTCGCCACAAAAAGGCAGTGGAAAGTCGAAATGAAATAAACTAGTaaCTGCAGatGCTAGCtcGCATGC</p> |
| PC28030 | <p>AATTGTGAGCGGATAACAATTAAGCTTacataaggaggaactactATGTCCATGTCAGATTGGATCGCCTACTGGACC GATAAGGACCATCTTTTGGATTTGTTGGAACAATACCGCAGTCTCGGACCGTTACCTGGTGTGGCCCTCACTTTT ATGAAATCATTGTGCCGCCACTGCCAACACTCGTCATCGTGGTGTAAACGCTGCTGTATACGGGCTGTGGTT GGGATTCTGTACTCATGGATTGGCCTGGTAGCGGGATGCCTCACCACGTTCTTGTGGTTCCGGCTATTGCAG ACCACCCGTTTCTCAAACGTTATGCCAACGCAAGAAGGTTCAGAACGGGCTTCGCTGGGTTTCGTAGAAACGCC TTCTCATATGTCTTATATTTATCTATTTTTCCGGTTGGGCCGTTGCTCGTTGTCAATGTGGCCGCTGCTCTCGCCG GAATGCGCTTCCGGTCATTCTTACTGGCGGTTGCGGCTGGGAAGGGGATTATGGTTCTCGCTGTAAGCATCGTT GGCCATGACGTTGGGCGGTATTATCGTAACCCGGAACCTCTATATATATAGTATTGTTGATAGGATTATCTTTG GTGGTTATGAAAAGACTTGAAGCCAAATACATGCGGCATACAGAGGAGACAGTTGTTGAATTAACGGGAGAA GCTGAGGCAAAGTAGACTAGTaaCTGCAGatGCTAGCtcGCATGC</p>                       |

|         |                                                                                                                                                                                                                                                                                                                                                                                                                                                                                                                                                                                                                                                                                                                                                                                                                                                                                  |
|---------|----------------------------------------------------------------------------------------------------------------------------------------------------------------------------------------------------------------------------------------------------------------------------------------------------------------------------------------------------------------------------------------------------------------------------------------------------------------------------------------------------------------------------------------------------------------------------------------------------------------------------------------------------------------------------------------------------------------------------------------------------------------------------------------------------------------------------------------------------------------------------------|
| PC16380 | <p>AATTGTGAGCGGATAACAATTAAGCTTacataaggaggaactactATGCTGGCACTGCCGCTCCCTGGGGAGATGCT<br/> GATGAGTTATACTGGAGTCTTCATATCCGAGGGCAGAATGAATTTGCTCTTGTCAATTATCGTGGCGGGCGTAG<br/> GTGTGACGGCGGGCGTGACCCTCTCATACTTCGTGGGGTACAAATTAGGCAAACCGTTCTGTTCTGAAATACGGT<br/> CGGCACTTCCACATCGGAGAGGCCCAACTGGCTAAGACATCCGTTTGGTTTGAAAAATACGGCGAAAAGCTGT<br/> TGTTTATCGCGTATTTTCATCCCAGGTGTACGCCACTTTACAGGTTATTTCTGTGGTGTGATGCGTGTACCTTTTCG<br/> CCACTACGCTCTTTATGCTTACACGGGCGCCTGTTCTGGGTCTGTACTTTTATTCTTCTGGCCATGCGCTTGGT<br/> GAAAAGTTTGAGGCATATCATCATACAATAAACAGATATATGTTGGTATTGATGTTGGTTGGAGTTGGCACATC<br/> TCTTTTGGTTTACTTTTTGCAAAGATTGAGAAAAAAGGCCACATGAACTAGTaaCTGCAGatGCTAGCtcGCATGC</p>                                                                                                                                                                                                        |
| PC15755 | <p>AATTGTGAGCGGATAACAATTAAGCTTacataaggaggaactactATGGAGCTGCTTAGTAACCTGCTTGAACATTAC<br/> GGTTACTGGATAATCCTGTTATTCTTGCTCTTTGAGATGTTAGCCCTCCCTCTGCCGGGTGAAATGATGATGGGC<br/> TATATTGGTTTATTCTGTCTATGAGCACAACTGAATTGGTTTGTAGCATTGCGAGCGCCTCATTGGGGGTAGT<br/> GTTAGGAGTTACTTTATCATATTGGATAGGCTACCGGCTGGGTCTCCGTTTATCATCCGGCACGGGAAGATGA<br/> TTCACTTTTAGAGGAGCGTCTTAACCGGATGACTGTATGGTTTGAAAAGTATGGGGATAAGCTTCTTTTCGTG<br/> GCTTACTTTATCCCAGGCGTGCCTCACATCACGGGTATTTTTGTGGTGTGACAAGAGTCTCCTTTCAAAGATAT<br/> GCACTTTATGCTTACAGTGGGGCTATCTTCTGGGCGAGTCTTTCATAAGCATGGGCAAGCTTCTCGGTCCGCA<br/> GTGGGAACAGTATCATTCTACCGTTAATCGGTACATGATAATGTTCCGGTATTGCTTCCGCTATGGTGGCAGTCT<br/> TATTTATATTTATAGAAAATACGGGTACAAGTGGTAGAAAAGTGAAGAAATTGTTCTGGTCTTTAACCGCA<br/> CGTTGTTGAACTGAAAATCAGAAAGCACATACGCTATCTGCTTCTATCGTGCCTGCGATTACCACCATAGCA<br/> GACGGACTGGATAAACTAGTaaCTGCAGatGCTAGCtcGCATGC</p> |
| PC7440  | <p>AATTGTGAGCGGATAACAATTAAGCTTacataaggaggaactactATGCACGTCTGTCTGACGTAGTCGCAACAATG<br/> CTTGAGTGGATGAAAGATTTAGGCTACTTTGGCATACTGTTCCGGCCTCATGGTGGAGGTAATACCAAGCGAAGT<br/> TGTTTTAGCGTATGCGGGGTACCTTGTGTACGACGGCCGGATCAGCTTCTCCGGTGCAGTTATATTTGGAACGG<br/> TAGGTGCCGTGCTTCAGAATTGGATATTATGCTATTGGCCGTTACGGAGGTCGCCCGTTTCTCGATAAATAT<br/> GGGAAATTTCTGAAAATTAAGAAAAAGCATATCGACATTGCCGAGGGATGGTTTGATAAATACGGTAAGGGGA<br/> TCGTGTTTACTGCACGCTTCGTCCCAGTCATGCGGCAAGTTATATCAATACCTGCCGGGATGGCTCGCATGTCCT<br/> TCGGAATATTTACTTTACTTACAGCGTTGGCGAGTTTGCCATGGAGCATTCTGTTCTGTACCTTGGAAAGATCAT<br/> TAGGAGATAATTGGGACACAATAGAAGAAGAGGCAGGCAAGTACATACACGAGGGTATCCTTGTGCTTTGG<br/> GTCTCTAATCGTTTACGTGGTTTTCAAGATCGTTAGATCACGCAACAATAAAAAATCTGCCTAACTAGTaaCT<br/> GCAGatGCTAGCtcGCATGC</p>                                                                                                       |
| PC5445  | <p>AATTGTGAGCGGATAACAATTAAGCTTacataaggaggaactactATGAGCCAATGGCAAGATTGGTTACATCACTTG<br/> AAGACGCTGGATTTAGAACATATGGAGAGAACCCTTAGATCTTATAGCGCATACGGTCCGTTGCCTGGTCTCCT<br/> CATGCCTATTGCGGAGGCATTGATACCAGCACTCCCACTTATCGTAATAGTAGCCGCCAACGCAAACATCTATG<br/> GGCTCTGGTACGGATTTCTTTTGGAGCTGGATAGGGGCGACCATTGGGGCCAATATCGTCTTTTGGTTGGCACGT<br/> AAACTCGGTGCGGCGTTGGGTGGGTGGTTTCTGTCGAGATTTCCAAAGTACAGCGGTTCTTCTGACTGGGTGG<br/> AGCATCGGGGTTTCACTCCTCTGTTCTGCTTGCATGTTTCCCGTTCACGCCGTCTGCGTTAATCAACATAGTGG<br/> CTGGCCTCTCAAATTCCTTTCCAACTTTCTTCTCGCCCACTCTTAGGTAATCAGTGATGATTTTTAGCATT<br/> AGTATTGTGTCAGCGGATATAAGTAGCTTAGGTGCGCAACCTTGGAGAATATTCGTCTTGATCACAGTCTTAGC<br/> CGAATGTGGTCTTGGGGAAGCAACTGGAGAGAAAATACGCTTTGAAGTAACTAGTaaCTGCAGatGCTAGC<br/> tcGCATGC</p>                                                                                                                    |

|        |                                                                                                                                                                                                                                                                                                                                                                                                                                                                                                                                                                                                                                                                                                                                                       |
|--------|-------------------------------------------------------------------------------------------------------------------------------------------------------------------------------------------------------------------------------------------------------------------------------------------------------------------------------------------------------------------------------------------------------------------------------------------------------------------------------------------------------------------------------------------------------------------------------------------------------------------------------------------------------------------------------------------------------------------------------------------------------|
| PC4905 | AATTGTGAGCGGATAACAATTAAGCTTacataaggaggaactactATGCGGAGATGGTGGGTAGTCCTTGCGTATGC<br>TATGTTAGTGGCGGGTGTGTTTGTGTGGAGACATGACATTCTTGACTGGCTCGAGCGCGGTGATGCACCTATTG<br>GGTGGTTGTTTCGTGGTAGCTATCGTATTAGCTTTCGTTCCGGTTGTACCTTACAAGGTGGTGATTGGGTCCCTCG<br>GAATCTTGTATGGACCGCTGACAGGAGCTGCGCTCTCCTGGCTCGCTACTACTATAGCTTCAGTCGTAATCTTTG<br>GCCTCGTCCGGTATTTCCGACAACGGCAAGGTAGAGCTTACCTTTCGTAACCGTCACACAGAGCGTCTGTCA<br>CAGTTAATGGAGCGTAAGCCTTTCATGTCAATTGCCCTTGTTCCGGTTGCTCGCTGTATTTCTAGCCTTCTTGCA<br>ACGTATATGCCGCGCTTCTTAGCATACGCTTACAACATTTATTACTGCAACTGCGATTGGTAAAATCCCTGCAA<br>TGCTGACCTTCGCTTTCCTGGGGCACGAACTCCTGAGAGATTGGCGGACCGCTTAGTAACCGCCTTAATCTAT<br>GTCTTATTCATTGCTTCACTACTCATAGTTTATCGTCGCTGGGAGAGACGCCAAGCATCTTAGACTAGTaaCTGCA<br>GatGCTAGCtcGCATGC |
|--------|-------------------------------------------------------------------------------------------------------------------------------------------------------------------------------------------------------------------------------------------------------------------------------------------------------------------------------------------------------------------------------------------------------------------------------------------------------------------------------------------------------------------------------------------------------------------------------------------------------------------------------------------------------------------------------------------------------------------------------------------------------|

**Supplementary Table 6 oligonucleotides used in this study**

| Name    | Sequence                                                               |
|---------|------------------------------------------------------------------------|
| oIR0374 | GATAACAATTAAGCTTgtctactaatataaaaatgtaaagggtg                           |
| oIR0375 | TGCAGtTAGTAGTtagaaatTTgatcggttggttttttc                                |
| oIR0376 | GATAACAATTAAGCTTataaatgtctaattggggagaatc                               |
| oIR0377 | TGCAGtTAGTAGTttacatcatgatcaaaagttaaatac                                |
| oIR0419 | gcataggaagtagagattttgg                                                 |
| oIR0420 | CGGTACTGAGCGAGGGAGCAGAAgattttgattctccccattagac                         |
| oIR0421 | CGGTAGTTGACCAGTGCTCCCTGgtcgaaaaataaggctcttttc                          |
| oIR0422 | ggcagcagcatcagtttaataag                                                |
| oIR0439 | TTGTGAGCGGATAACAATTAAGCTTaacctttttgggtgacggag                          |
| oIR0440 | CATGCgaGCTAGCatCTGCAGtTAGTAGTctaaattccgcaaacctccg                      |
| oIR0447 | cagttcttataaaagacgacag                                                 |
| oIR0450 | ctcggtttttcagtaattgatgg                                                |
| oIR0467 | CGAACGGTACTGAGCGAGGGAGCAGAAgagattcctcgtcacccaaaaagg                    |
| oIR0468 | GAACGGTAGTTGACCAGTGCTCCCTGcaggcgttaggagagtttcagcag                     |
| oIR0483 | gcagctcaataataaaactagaatcc                                             |
| oIR0484 | CGGTACTGAGCGAGGGAGCAGAAattcttcacaacctgtcctaac                          |
| oIR0485 | CGGTAGTTGACCAGTGCTCCCTGctagcggatatgcataggggtgac                        |
| oIR0486 | cctgtcggcattgttgcaaac                                                  |
| oIR0487 | cagaaagatcatagcctttgtcatg                                              |
| oIR0488 | CGGTACTGAGCGAGGGAGCAGAAacatttttctcttttcggaaaaatc                       |
| oIR0489 | CGGTAGTTGACCAGTGCTCCCTGcaaatcactgcgctgcgcatattattg                     |
| oIR0490 | gtgcagcaccctttaagataatc                                                |
| oIR0491 | gaaacgactattcctgtcactcttc                                              |
| oIR0492 | CGGTACTGAGCGAGGGAGCAGAATTAgtaatccgctatgagctgctgaa                      |
| oIR0493 | CGGTAGTTGACCAGTGCTCCCTGcggagggttataggattattc                           |
| oIR0494 | ccagcatatatgtttccattacg                                                |
| oIR0496 | TAACAATTAAGCTTacataaggaggaactactAtgggcagtttgataagcgaatttaac            |
| oIR0497 | CTGCAGtTAGTAGTctatcgtttaaatatggctgtacg                                 |
| oIR0499 | AATTGTGAGCGGATAACAATTAAGCTTacataaggaggaactactatgatacataaacatgaaacaaggg |
| oIR0500 | ATGCgaGCTAGCatCTGCAGtTAGTAGTcaacgtttattttcaaaaatagc                    |
| oIR0518 | TAACAATTAAGCTTacataaggaggaactactatggctgttattcaagatatcatc               |
| oIR0519 | CTGCAGtTAGTAGTtcaggcgttacagtatttttttaaac                               |
| oIR0520 | TAACAATTAAGCTTacataaggaggaactactatggaacttttgaccaattgctg                |
| oIR0521 | CTGCAGtTAGTAGTttacccccgatttccatatttctttttcc                            |
| oIR0522 | atactcaaaatattatCCATGGtatGAATTCgtgctaatacaggtccgaaatag                 |
| oIR0523 | tattaaaaataagctcctttaattttcagc                                         |
| oIR0524 | gctgaaaataaaggagcttatttttaataGAATGGCGATTTTCGTTTCGTG                    |
| oIR0525 | CCTATGCAAGGGTTTATTGTTTTC                                               |
| oIR0526 | GAAAACAATAAACCTTGCATAGGtattgtttagcataaaggcatg                          |
| oIR0527 | CACGTTTCGCTCGCGTATCGGTGATGGATCCttgtcagtgacacataactttatattattg          |
| oIR0528 | aatatactcaaaatattatCCATGGtatGAATTCctttaccagcatacattacatgtac            |
| oIR0529 | gaataactcctttcaaacgattgg                                               |
| oIR0530 | ttccaatcgtttgaaaggagtatttcgaggatgaaggatgagg                            |
| oIR0531 | catcagagtatggacagttg                                                   |
| oIR0532 | catccgcaactgtccatactctgatgtcatttttaggggtgataaaatattttcag               |

|         |                                                                                       |
|---------|---------------------------------------------------------------------------------------|
| oIR0533 | CACGTTTCGCTCGCGTATCGGTGATGGATCCcattaattcgaactttgcaatcg                                |
| oIR0534 | AGTATGATGGTACCgaaaattaaaggagcttatttttaataatgg                                         |
| oIR0535 | GCCACCTGGAATTCtattttactctcttacgtttgcc                                                 |
| oIR0536 | ATCATTGATAGAGTATGATGGTACCattccaatcgttgaaaggag                                         |
| oIR0537 | CATTTCCCGAAAAGTGCCACCTGGAATTCtattcatttcagcggttaattcg                                  |
| oIR0549 | gatacttgctgttctgtcgtgc                                                                |
| oIR0550 | CGGTAAGTACGAGGGAGCAGAAAttatactccttaccgggtttg                                          |
| oIR0551 | CGGTAGTTGACCAGTGCTCCCTGgtgagcatgatggaggagac                                           |
| oIR0552 | ctgcctcaatgacagcaaacg                                                                 |
| oIR0553 | ctgcgccatacatgtgaagc                                                                  |
| oIR0554 | CGGTAAGTACGAGGGAGCAGAAgtctatggtcactccaacttag                                          |
| oIR0555 | CGGTAGTTGACCAGTGCTCCCTGataaggaggcttgggtggccc                                          |
| oIR0556 | ccttctgataatcgcgcgcg                                                                  |
| oIR0557 | ttgaagacggaatgctgaatg                                                                 |
| oIR0558 | CGGTAAGTACGAGGGAGCAGAAccttgaaccacagcaattatgg                                          |
| oIR0559 | CGGTAGTTGACCAGTGCTCCCTGgatttgcaatgacctttacg                                           |
| oIR0560 | gaagaaagctgtaccatatacgc                                                               |
| oIR0626 | GAAGAGAATTATAATGCGAACGAGC                                                             |
| oIR0627 | CGGTAAGTACGAGGGAGCAGAAATTACGCAGTCTCCTTTATATTGG                                        |
| oIR0628 | CGGTAGTTGACCAGTGCTCCCTGAACAGAAAAAGCTCCAGACATTCTG                                      |
| oIR0629 | CTCCGATAGTCAGGATCACCATC                                                               |
| oIR0733 | GTCAGCCGTATTTTTCTGTGTTGG                                                              |
| oIR0734 | CGGTAAGTACGAGGGAGCAGAAATTCGGTTGTCCTCAATACTG                                           |
| oIR0735 | CGGTAGTTGACCAGTGCTCCCTGCTGAGGCTGTAAAAGCCTCAG                                          |
| oIR0736 | CTAAACGATTGCAACAGTAGCG                                                                |
| oIR0737 | GTGGAATTGTGAGCGGATAACAATTAAGCTTCTTCAGTATTGGAGGACAACCG                                 |
| oIR0738 | ATGCgaGCTAGCatCTGCAGtTAGTACTAGTTTCTTTTACTTTTGGAAAG                                    |
| oIR0986 | CTGCAGtTAGTtctgtttaaataatggctgtacg                                                    |
| oIR0987 | cggagttgtcttctcggtGCAtttataaccggtgtcagacatgcc                                         |
| oIR0988 | ggcatgtctgacaaccggtataaaTGcagccgagaagacaactccgg                                       |
| oIR0989 | cggctcgttttataaccggtgtcGCAtgcatccatccattccggcag                                       |
| oIR0990 | gcccgaatggatggcatgTGCgacaaccggtataaaacgagc                                            |
| oIR0991 | cggctGCAtttataaccggtgtcGCAtgcatccatccattccggcag                                       |
| oIR0992 | ggcatgTGCgacaaccggtataaaTGcagccgagaagacaactccgg                                       |
| oIR0999 | GGTGATTATATTCGTTTCCGATACCG                                                            |
| oIR1000 | GCTAAACCTGACAGTGCAGATG                                                                |
| oIR1031 | ctatataaaataactcaaaaattatCCATGGtatGAATCCCACTATCGGCGGAATGATGATG                        |
| oIR1032 | CAACCTGTCTAATCTTTTTCAATTTTTTACCGCAGCATTTCTTTCTGTTCC                                   |
| oIR1033 | GAAATGCTGCGGTAAAAAATTGAAAAAGATTAGGACAGGTTGTG                                          |
| oIR1034 | CACGTTTCGCTCGCGTATCGGTGATGGATCCGTATACGAGTTGTTGTAGCTGAAGC                              |
| oIR1105 | TATTATGACTGATTGACGAGCAAGATGGTTACAATTTGAATTCTCATGTTGACAGCTTATC                         |
| oIR1106 | CATTACCAAGTTGGTCTGGTGTG                                                               |
| oIR1107 | CATCTTGCTCGTCAATCAGTCATATAATAGTGAAAAAGATTAGacataaggaggaactactatgagtaaaggagaagaacttttc |
| oIR1108 | TTTGACACCAGACCAACTGGTAATGttattgtatagttcatccatgcc                                      |
| oIR1128 | AATTGTGAGCGGATAACAATTAAGC                                                             |
| oIR1129 | GCATGCgaGCTAGCatCTGCAG                                                                |
| oIR1130 | AATTGTGAGCGGATAACAATTAAGCTTacataaggaggaactactatgaggaatttattcagtatgg                   |

|         |                                                                          |
|---------|--------------------------------------------------------------------------|
| oIR1131 | GCATGCgaGCTAGCatCTGCAGttACTAGTttatttctaccgaaataagtaacaatcgc              |
| oIR1132 | AATTGTGAGCGGATAACAATTAAGCTTacataaggaggaactactatgctctcatggttagcacgc       |
| oIR1133 | GCATGCgaGCTAGCatCTGCAGttACTAGTttatttatatttatcctccaattgactcatcc           |
| oIR1134 | AATTGTGAGCGGATAACAATTAAGCTTacataaggaggaactactatgagcgccaccaaacctgatg      |
| oIR1135 | GCATGCgaGCTAGCatCTGCAGttACTAGTttagcgcgggtgctcttctgcc                     |
| oIR1144 | AATTGTGAGCGGATAACAATTAAGCTTacataaggaggaactactatggacctgatttatttctcatc     |
| oIR1145 | GCATGCgaGCTAGCatCTGCAGttACTAGTttattttgvcggcgctgccg                       |
| oIR1148 | AATTGTGAGCGGATAACAATTAAGCTTacataaggaggaactactatgatgtaggagagttgatcc       |
| oIR1149 | GCATGCgaGCTAGCatCTGCAGttACTAGTTTActttttttcatcatttttttaatacaaaaataacc     |
| oIR1180 | AATTGTGAGCGGATAACAATTAAGCTTacataaggaggaactactatgcaagcattgctggaacac       |
| oIR1181 | GCATGCgaGCTAGCatCTGCAGttACTAGTctaaacccaaccactttacgc                      |
| oIR1182 | AATTGTGAGCGGATAACAATTAAGCTTacataaggaggaactactatggatctcaatacacttatctc     |
| oIR1183 | GCATGCgaGCTAGCatCTGCAGttACTAGTttacgcctgatgatccggcttttc                   |
| oIR1184 | AATTGTGAGCGGATAACAATTAAGCTTacataaggaggaactactatgaacgctgagcgtaaatctc      |
| oIR1185 | GCATGCgaGCTAGCatCTGCAGttACTAGTctatccttcatttttgggtgag                     |
| oIR1186 | AATTGTGAGCGGATAACAATTAAGCTTacataaggaggaactactatgatgatgatgcaatcgcg        |
| oIR1187 | GCATGCgaGCTAGCatCTGCAGttACTAGTtcaggcattcctcttctggc                       |
| oIR1188 | AATTGTGAGCGGATAACAATTAAGCTTacataaggaggaactactAtgagtggaagcgttatcgcttttc   |
| oIR1189 | GCATGCgaGCTAGCatCTGCAGttACTAGTttagtgccaccacatcatgcc                      |
| oJM028  | TTCTGCTCCCTCGCTCAG                                                       |
| oJM029  | CAGGGAGCACTGGTCAAC                                                       |
| oIR1348 | aatatactcaaaatattatCCATGGtatGAATTCaaaagcacgtgaagaattatcttcagataaattag    |
| oIR1349 | cttttctgatccataaaatgaaccattcttctacttgatgaacgac                           |
| oIR1350 | catcaagtagaagaatggtttcattttatgggatcgaaaaaggagtgc                         |
| oIR1351 | CACGTTCCGCTCGGTATCGGTGATGGATCCtaaatatttaccttttggatgacatttgatttagg        |
| oIR504  | TAACAATTAAGCTTacataaggaggaactactatggaacaaattatcactgaatttattagc           |
| oIR505  | CTGCAGttACTAGTttattttactctttacgtttgcc                                    |
| oIR506  | AATTGTGAGCGGATAACAATTAAGCTTacataaggaggaactactatgcaacaatttaaaggattaatattc |
| oIR507  | ATGCgaGCTAGCatCTGCAGttACTAGTttattcattttcagcggaattcgc                     |
| oIR1367 | AATTGTGAGCGGATAACAATTAAGCTTacataaggaggaactactatgctgttcatcaagtagaagaatgg  |
| oIR1368 | GCATGCgaGCTAGCatCTGCAGttACTAGTtcaactccttttctgatccataaaatgc               |
| oIR344  | GAAGTTCCGAATGTTGTAGGG                                                    |
| oIR345  | CTGAGCGAGGGAGCAGAAGGTGTCCTTTTCTCCTCCTGTTTC                               |
| oIR346  | GTTGACCAGTGCTCCCTGAGGTGGAAAATGATCAATTTTTACAG                             |
| oIR347  | CCGATCAGCCCGAGAAAAGAC                                                    |
| oIR388  | cgttaccgaactgtcttcg                                                      |
| oIR389  | CGGTAAGTACTGAGCGAGGGAGCAGAAttctttttccccagtctaag                          |
| oIR390  | CGGTAGTTGACCAGTGCTCCCTGtagaaaagcaaatggaatgcgg                            |
| oIR391  | ccggtatgtatgacgcatcttc                                                   |
| oIR1326 | tctagaGGATCCacagagatgatcaggctcggag                                       |
| oIR1327 | gccagtGAATTCtactcctcactcaatccgcc                                         |
| oIR1332 | tctagaGGATCCgtaaataggagtctaagtggaggatttacg                               |
| oIR1333 | gccagtGAATTCtaaatcgttaatacgttcaatgtctgcacc                               |

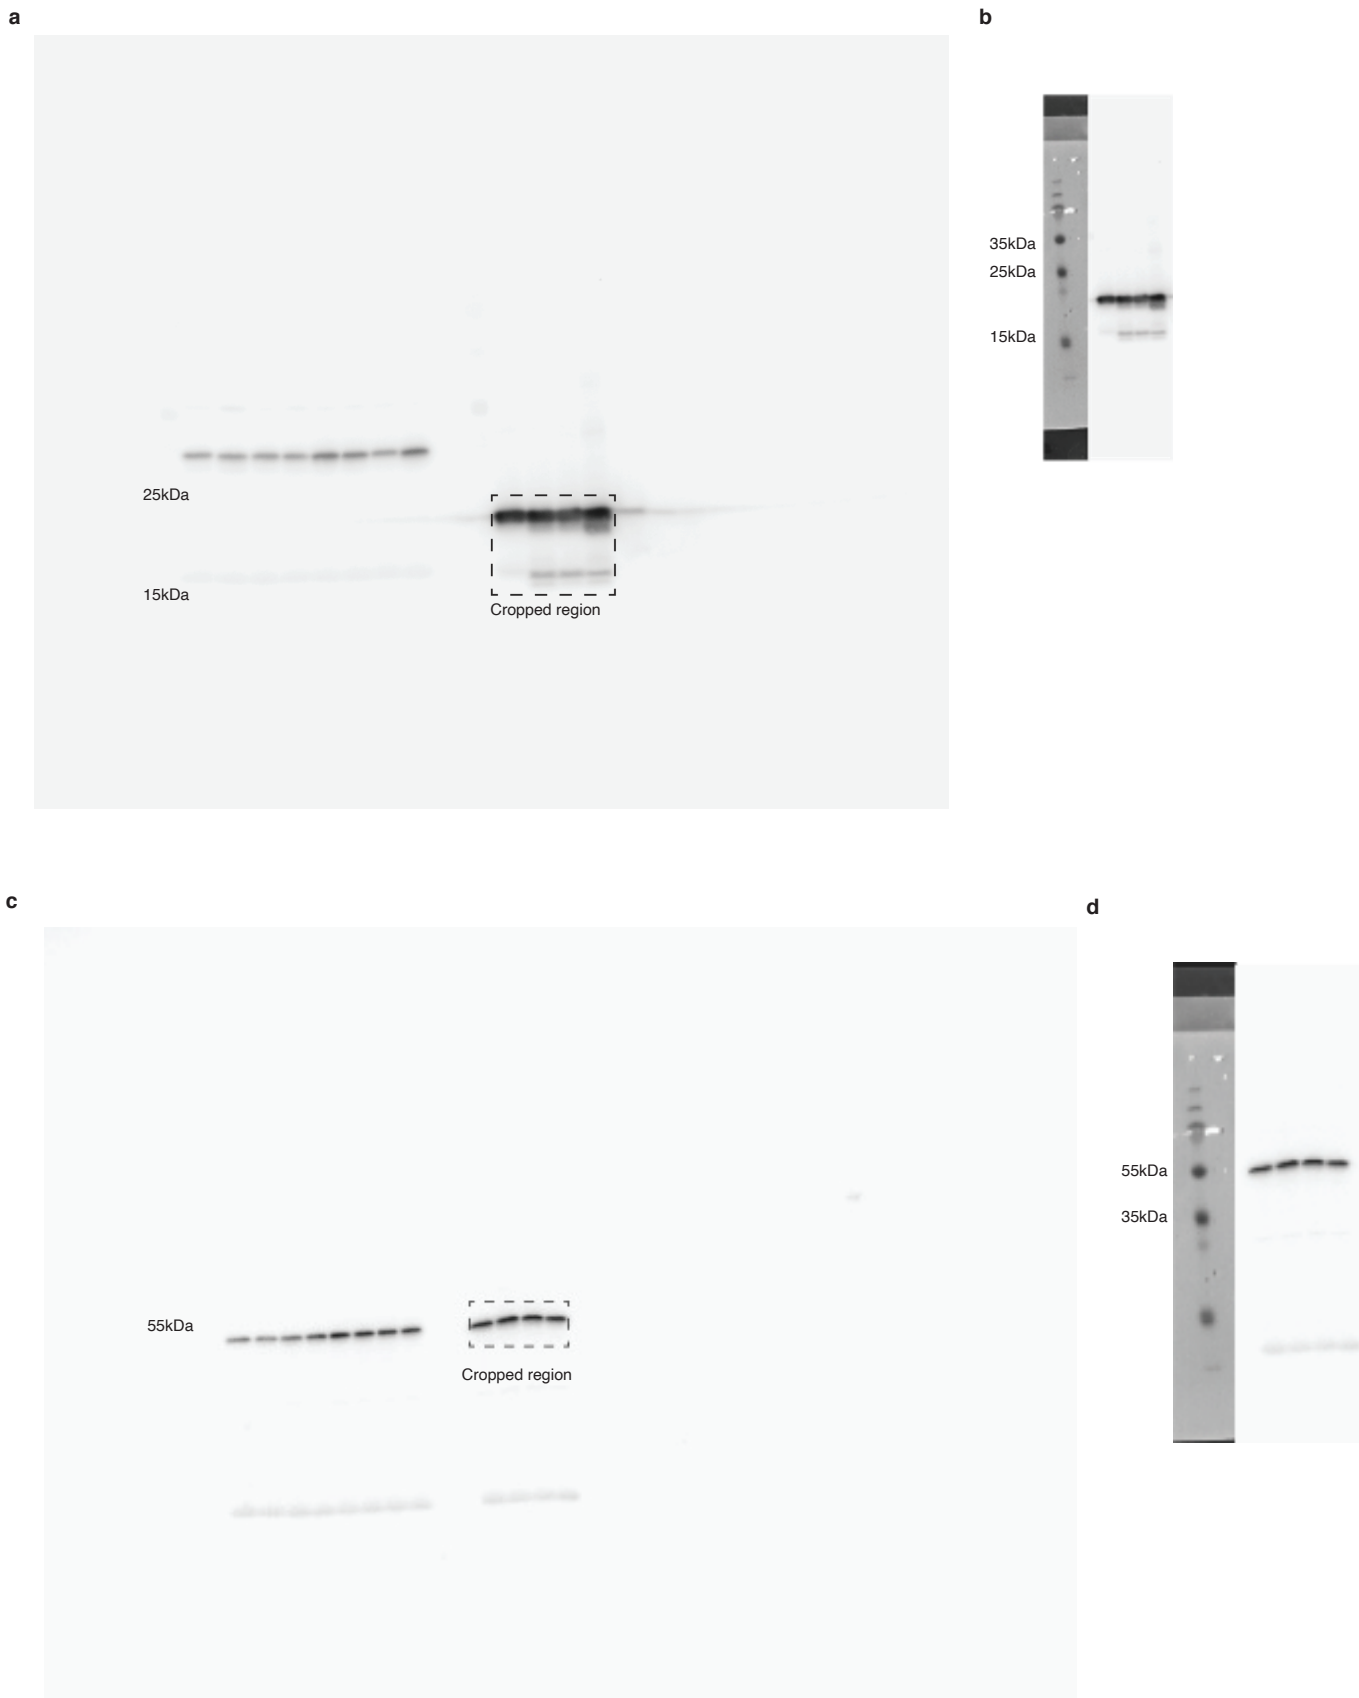

**Supplemental Figure 1.** Uncropped gel source data for Extended data 2c. **(a)** Uncropped western blot of the his tagged yngC protein with cropped region indicated. **(b)** Spliced image of visible and chemiluminescent channels to highlight molecular weight. **(c)** Uncropped western blot of the sigA protein with cropped region indicated. **(d)** Spliced image of visible and chemiluminescent channels to highlight molecular weight.



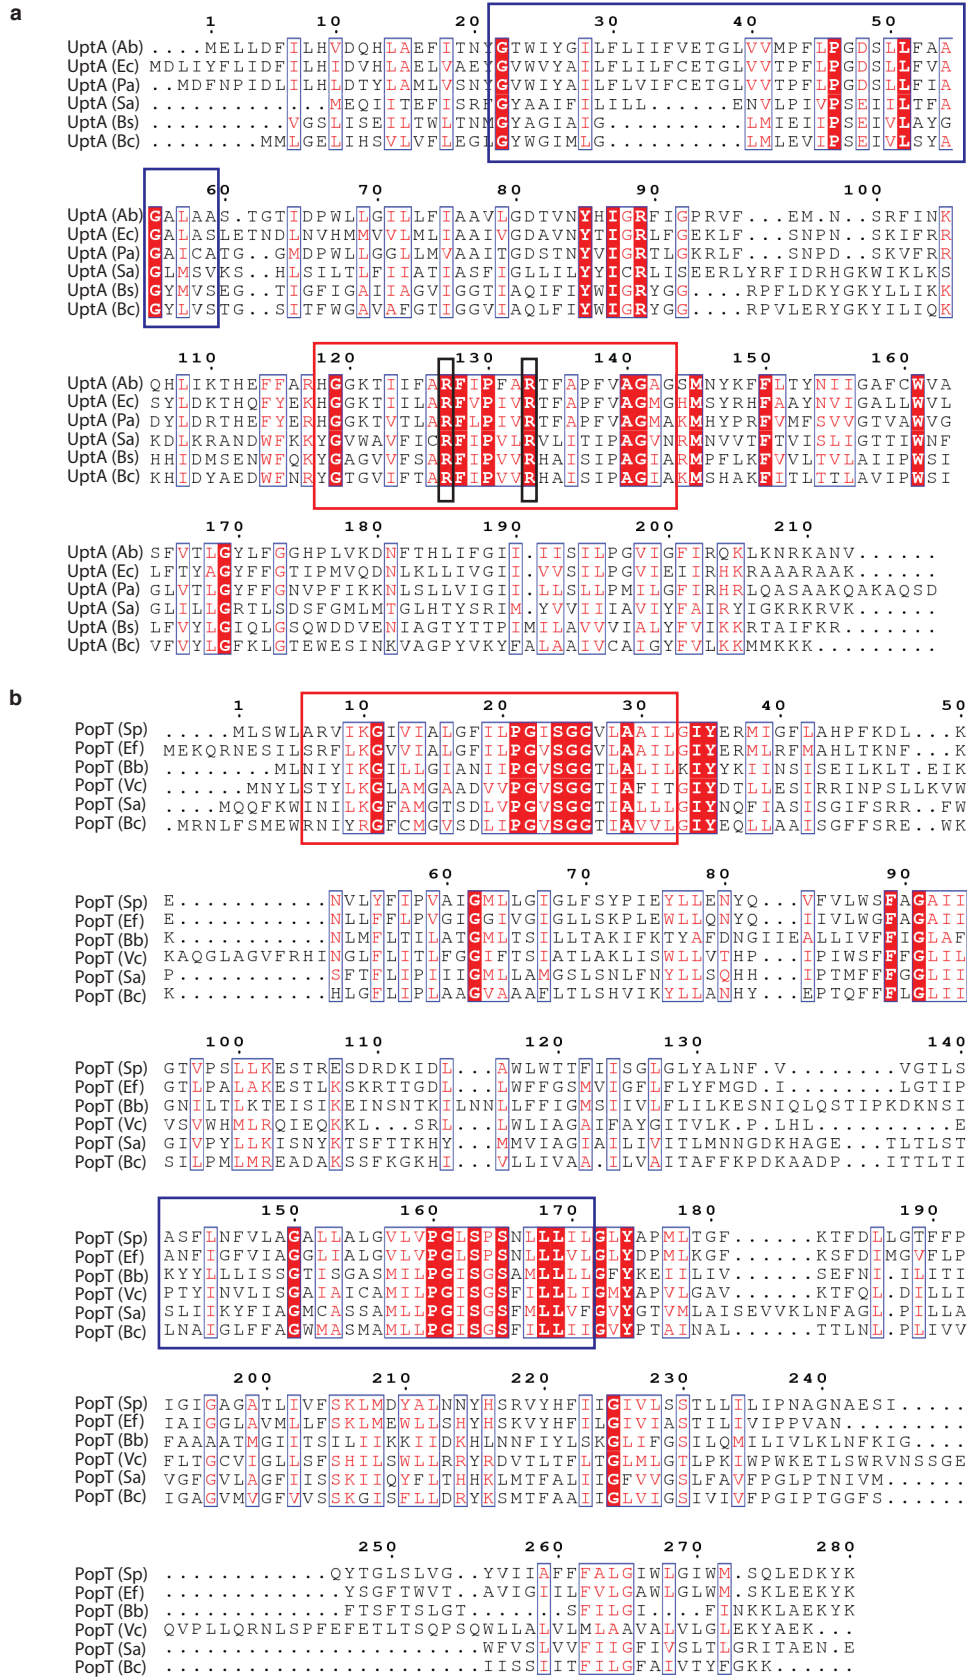

**Supplemental Figure 2.** Multiple sequence alignments of DedA (UptA) and PopT homologs that provide MX2401 resistance. **(a)** Multiple sequence alignment of DedA (UptA) homologs that provide MX2401 resistance. Two highly conserved arginines are boxed in black and two membrane re-entrant helices that are commonly found in membrane embedded transporters13 are boxed in red and blue. **(b)** Multiple sequence alignment of DUF368 (PopT) homologs that provide MX2401 resistance. Homologous re-entrant helices that are commonly found in membrane embedded transporters13 are boxed in red and blue.

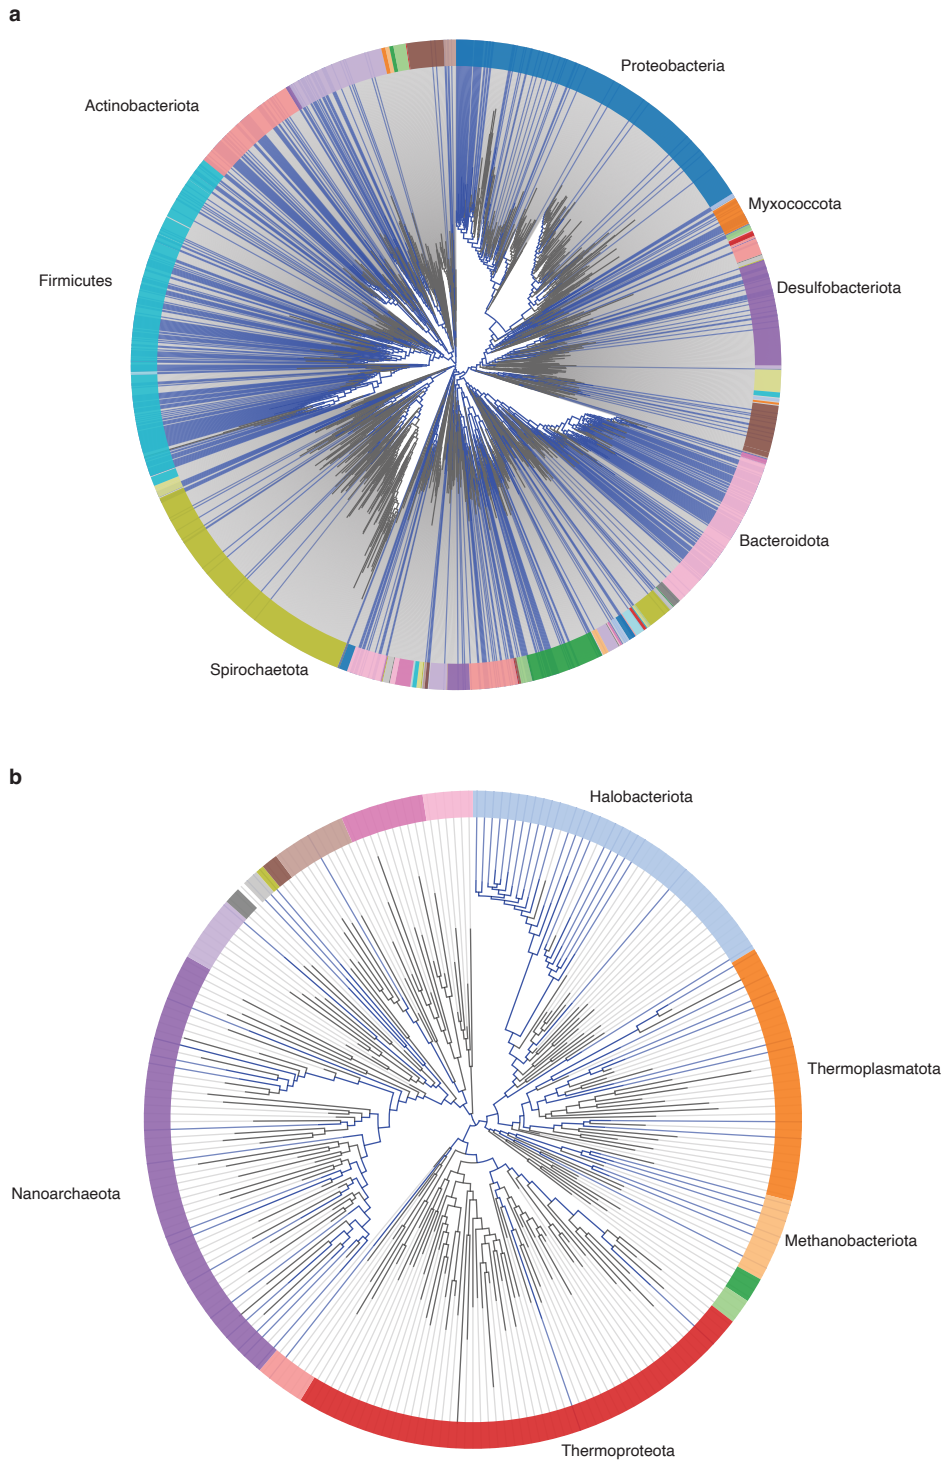

**Supplemental Figure 3.** DUF368 is broadly conserved in bacteria and archaea. Dendrograms highlighting the distribution of DUF368 domains in a broad range of bacteria (**a**) and archaeal (**b**) species. All members of the pfm04018 (DUF368) were mapped onto representative phylogenetic trees.
